# Supplementary material for: Quantitative proteomics reveals the protective effects of Yinchenzhufu decoction against cholestatic liver fibrosis in mice by inhibiting the PDGFRβ/PI3K/AKT pathway
Source: Front Pharmacol. 2024 Feb 26;15:1341020. doi: 10.3389/fphar.2024.1341020 (PMC10926276; doi:10.3389/fphar.2024.1341020)
Supplement: Supplementary file 1 [file Table3.XLSX]

## Sheet: DEP
	CON1	CON2	CON3	CON4	CON5	CON6	CON7	CON8	DDC1	DDC2	DDC3	DDC4	DDC5	DDC6	DDC7	DDC8	YCZFD2	YCZFD3	YCZFD4	YCZFD5	YCZFD6	YCZFD7	YCZFD8	YCZFD9	FC_DDC_CON	FC_YCZFD_DDC	padjust
A0A0A6YYE7_Igkv4-57	1.09502	1.02258	1.38298	0.760517	0.815395	0.97742	1.08008	0.829249	2.82161	1.01327	2.86715	2.59171	2.42117	3.03836	3.10773	2.72354	1.83017	1.3815	0.665584	0.907451	0.552886	1.19573	1.16901	0.805006	2.77258	0.374463	4.54e-06
A0A140T8M1_Igkv10-96	1.42776	0.360955	1.01822	0.762003	0.987275	1.01272	1.58559	0.759435	3.13253	0.501473	1.41565	2.41435	2.19769	1.6237	1.01627	2.35967	1.35254	1.31748	2.2365	1.38991	1.71519	2.04966	1.3093	2.61686	1.91069	0.812558	0.0341035
A0A140T8P6_Igkv12-46	1.13052	0.708722	1.01552	1.30793	0.984479	0.844753	0.17947	1.72533	1.88886	1.6464	0.705166	1.793	1.9484	3.26585	2.22039	1.63172	1.38956	1.51701	1.19003	1.20017	1.06457	1.58259	0.349137	0.51843	1.84093	0.649183	0.0122024
A0A5F8MPH8_Tnxb	0.583989	0.935544	0.785397	1.24738	1.45247	1.43913	1.06446	0.923287	3.87973	3.53264	3.60359	3.24603	2.47902	2.97365	3.25446	3.67337	2.25175	2.54213	2.0301	1.71089	2.25885	2.38243	2.57833	2.8821	3.39355	0.68384	5.81e-09
A2AJI0_Map7d1	0.991636	1.00836	2.02345	2.57075	3.12318	0.633709	0.925437	0.204202	2.41723	3.14998	3.12891	4.432	4.29499	4.78995	4.90949	5.32686	5.77974	4.29732	3.10452	4.17168	3.30076	3.49561	1.66377	3.46572	4.3635	0.797678	0.000387654
A2AK42_Gm13697	0.469487	0.899004	1.71457	1.01276	1.15394	0.722086	0.987242	1.4314	2.23333	2.76755	2.82182	2.76923	2.72114	2.44712	2.64441	2.11944	1.96483	2.07066	1.56471	1.88524	2.13376	1.85418	1.01974	2.58841	2.68278	0.717553	2.2e-06
A9XX86_Mgl2	1.38798	0.891425	0.346999	1.39413	0.843353	1.10858	0.873909	1.17025	1.72666	1.31824	2.1717	1.9766	1.31114	2.22909	1.58663	1.33917	0.670592	1.28305	0.726363	1.09265	2.4125	2.21706	1.38526	0.818361	1.65664	0.717022	0.0425824
B2RQC6_Cad	0.983107	0.959599	1.23479	1.10354	1.42954	1.01689	0.753491	0.595707	1.26189	1.32801	1.41222	1.14117	1.48785	1.40609	1.5288	1.641	1.45554	1.31388	1.18868	1.07936	1.10061	1.1539	1.08074	1.17068	1.40915	0.824816	0.00410829
B2RY04_Dock5	0.932554	1.15342	0.908722	1.00289	0.775632	0.997113	1.1844	1.24316	1.9584	2.35137	1.91405	1.52359	2.10617	1.38916	2.35688	1.70417	1.55225	2.17942	0.80413	1.17791	1.10452	1.11112	1.43502	2.30406	1.93623	0.674748	0.00131546
B9EJ86_Osbpl8	1.03571	0.7936	0.934336	1.20033	0.768701	0.964286	1.09859	1.05823	1.36436	1.36807	1.37127	1.2303	1.27343	1.58802	1.32145	1.22708	1.11288	1.1084	1.07382	1.05131	1.09221	0.91699	1.26558	1.36628	1.3429	0.819346	0.00026813
E0CZ22_Mroh1	0.23202	1.28095	1.12081	1.10616	1.68278	0.893836	0.75196	0.733212	1.24753	1.33857	1.35416	1.92667	1.04629	1.46239	1.36203	2.5159	2.10418	1.77429	1.28479	1.90068	0.985992	1.8332	1.31269	1.95385	1.3581	1.32814	0.0200589
E9PWQ3_Col6a3	0.813416	1.03231	0.737857	1.13145	1.32303	1.35918	0.967688	0.822803	3.64149	2.73651	2.5497	2.46472	2.23666	3.2456	2.72624	2.37319	1.84686	2.06752	2.09737	1.99917	2.49847	2.68758	2.35783	2.21231	2.63797	0.816855	6.93e-08
E9PYF4_Lmo7	1.00468	1.05058	0.748372	0.882157	0.91907	1.13747	0.995322	1.14874	1.65486	1.94693	1.52185	1.07231	1.71993	1.31631	1.70026	1.23369	1.15677	1.2825	1.32678	1.15142	1.44117	1.41374	1.34428	1.27551	1.58836	0.821379	0.000231283
E9Q236_Abcc4	1.13706	0.577138	1.43948	0.758708	1.15026	1.0619	0.652949	0.938103	1.69971	1.85041	2.25125	2.22528	1.88809	2.38736	3.39942	2.23487	3.7671	2.46378	2.08117	3.429	2.23996	1.13919	2.9139	3.96827	2.23007	1.20572	0.000170574
F6TQW2_Ighg2c	1.02175	1.11456	3.77853	0.606252	0.761777	0.978251	0.22533	1.28304	6.22123	1.84073	2.36685	3.98011	2.88322	3.93452	2.11283	4.7103	1.67053	1.63685	1.41092	1.90699	3.16734	1.52559	1.80351	1.91084	3.40887	0.509559	0.00308865
F8VQ05_Fryl	1.17934	0.998413	2.45506	1.2551	1.00159	0.510787	0.674319	0.458464	1.63183	1.53544	0.931551	1.81583	2.22459	2.1235	2.1588	2.13451	1.89914	1.57554	1.42687	1.41797	1.54754	1.2923	1.72411	1.87978	1.96966	0.792797	0.0192592
O08532_Cacna2d1	1.06049	1.5035	0.785874	1.36867	1.08507	0.821664	0.934761	0.939506	1.265	0.623202	1.62995	0.921863	1.10584	1.62994	1.30782	1.48885	0.322833	0.671383	0.498696	0.783044	0.701517	0.241113	0.870204	1.03187	1.28641	0.533618	0.00325285
O08539_Bin1	0.93947	0.736857	1.11095	1.3372	1.06053	0.912087	1.67694	0.547946	1.7235	1.28232	1.56878	1.77112	1.61073	1.68245	1.81587	1.59816	2.4632	1.81752	2.11154	2.07402	2.4107	1.83735	2.00534	1.76116	1.64659	1.23873	4.77e-06
O08692_Ngp	1.00364	0.99636	3.43579	1.64172	2.03107	0.28729	0.507417	0.441876	25.3737	37.1597	26.3908	24.3725	14.7891	20.6249	28.7717	32.8156	49.0134	19.2429	14.6725	17.6451	28.8401	18.3596	17.6871	40.4372	25.8823	0.726415	1.72e-05
O08784_Tcof1	1.47214	0.94881	0.486687	1.05119	2.82399	0.329326	0.308644	1.407	1.1851	2.67803	2.87638	2.07059	1.82811	4.03068	4.57352	6.35031	3.52494	4.84083	3.11786	3.5248	3.42397	3.52363	2.31106	4.30071	2.7772	1.26898	0.00164332
O08797_Serpinb9	3.61658	0.977347	0.632429	0.911706	0.92765	1.10836	1.02265	1.42632	2.71032	1.62995	2.57746	3.42028	2.37618	2.63934	3.12449	3.57296	4.05964	3.38665	2.52888	3.17862	3.67458	3.58207	2.4446	3.12787	2.67483	1.22723	0.000249431
O08804_Serpinb6b	0.900259	0.837194	0.986026	1.14773	1.43001	1.01397	1.03456	0.389544	2.80417	0.969208	1.6902	1.25363	1.97206	1.58841	1.79058	1.79165	3.43652	2.77808	1.91331	1.34304	2.09947	2.55359	1.38623	2.34156	1.74039	1.27587	0.00116118
O35874_Slc1a4	0.900261	0.460541	3.37723	0.673242	2.3274	1.09974	1.30927	0.729586	3.47259	3.05931	2.50424	3.19988	3.75528	3.1408	4.01221	3.33474	3.36699	2.42612	2.3476	2.09488	2.7048	2.63788	3.34233	3.33786	3.26731	0.817596	0.000130336
O70172_Pip4k2a	1.46295	1.30285	0.979302	0.86043	1.42715	0.961853	0.764268	1.0207	2.46928	2.88486	3.18481	3.79719	2.69366	2.80256	3.61295	4.83847	4.09873	4.42398	2.4739	3.87288	4.94926	3.76136	2.78752	4.47471	3.03483	1.31335	8.87e-07
O70309_Itgb5	1.19549	1.04374	0.800654	0.95626	1.09256	0.875307	0.808562	1.16489	3.13579	3.31028	3.65289	3.7251	1.74943	2.40774	2.8931	2.43296	2.62013	2.87248	1.88304	1.11469	1.87162	2.76682	2.00253	2.62857	3.01445	0.766751	7.67e-06
O88447_Klc1	0.909652	1.15667	1.8291	1.44776	1.00544	0.834855	0.994562	0.777269	1.78418	1.73638	2.55913	1.81724	1.19407	2.18746	2.79852	3.53598	3.41132	2.83059	3.1143	2.23008	2.66492	1.91676	1.94854	2.36535	2.00235	1.25609	0.000352759
O88736_Hsd17b7	0.959921	0.96254	0.917174	1.03746	1.16181	1.14467	0.810822	1.16329	1.60538	2.26808	1.33694	1.19227	1.82415	1.0919	1.68754	1.51215	1.24931	1.45325	1.28299	1.01371	1.32049	1.27067	1.20134	1.25175	1.55876	0.809111	0.00163915
P01921_H2-Ab1	2.75982	0.776891	1.3764	1.56556	1.01728	0.568899	0.982724	0.472263	21.0587	16.1279	18.2203	16.5952	10.7126	14.1313	17.9679	17.7845	14.2567	13.9652	11.1033	8.09694	14.6588	14.1003	9.65947	14.9909	17.1898	0.816339	1.36e-09
P04230_H2-Eb1	0.277253	1.24261	0.899831	1.26749	1.0783	1.10054	0.91471	0.921699	4.09239	4.09207	5.87783	3.66733	2.59861	2.95657	4.44898	3.38563	10.0341	4.2416	2.24979	2.20409	3.21238	2.89588	1.58072	2.21523	3.8797	0.663153	0.00736988
P04441_Cd74	2.04418	0.597732	1.01905	1.54148	1.21573	0.980953	0.779352	0.283758	10.1112	7.54148	7.59526	6.68789	2.74044	4.71448	7.06569	3.99195	5.82089	6.91819	4.57085	3.56676	5.64553	5.73954	4.38057	4.06793	6.87679	0.742816	1.02e-05
P05622_Pdgfrb	1.76478	1.00141	0.562386	1.09161	1.22947	0.998593	0.965006	0.631037	7.81799	7.33509	3.48922	4.69407	3.69702	4.42472	6.61143	5.79924	4.17184	4.0735	2.75895	1.26897	3.68056	2.06439	2.44473	2.95388	5.24666	0.544425	2.98e-06
P06344_	1.0262	0.985216	1.30846	0.773278	0.585345	0.25193	1.51076	1.01478	6.16468	5.22859	7.08582	5.42496	2.91751	4.23215	5.61903	4.58566	4.78372	5.36699	2.81033	3.36091	4.99966	4.28101	3.3071	2.40198	5.32678	0.717312	6.61e-07
P06728_Apoa4	0.953721	1.19314	1.34715	0.962989	1.30732	0.700899	0.82415	1.03701	1.18577	1.52621	0.952116	1.48903	1.60911	1.09662	1.78014	1.62526	1.37778	1.08406	1.2212	1.12263	1.03824	1.11086	0.974643	1.18696	1.50762	0.740734	0.0179667
P07744_Krt4	0.502242	2.63694	1.20384	0.559461	1.0482	0.701491	2.05948	0.951803	8.06028	79.0453	48.4176	25.1686	49.1025	42.8888	64.5826	17.141	49.2804	51.388	7.15945	10.4378	24.3655	9.02335	2.88935	6.71023	45.6532	0.213142	0.00164902
P08071_Ltf	0.733621	1.35576	1.01507	0.338262	0.365776	1.16814	0.984935	1.05754	2.8478	3.9505	3.53172	3.63895	1.65662	2.77995	3.62399	5.01619	6.07084	2.30836	1.80213	1.98249	3.65339	2.53377	2.02928	5.76978	3.57786	0.676681	0.000900657
P09803_Cdh1	0.970652	0.915115	0.985438	1.04192	1.07007	1.07373	1.01456	0.803773	2.64667	2.41682	2.00594	1.98965	1.90683	2.10522	2.4328	1.7972	1.68589	1.39623	1.57236	1.58327	1.56099	1.67521	1.96253	1.83037	2.05558	0.792594	1.4e-08
P11087_Col1a1	0.846356	1.27661	0.594147	1.07978	1.4252	0.936483	1.05983	0.940173	3.62148	1.67726	2.13489	1.91602	2.2111	2.16526	1.64704	2.246	1.59459	1.5844	1.49745	1.5161	1.75435	1.66969	1.76047	1.54759	2.15008	0.739273	7.96e-05
P11152_Lpl	1.15667	0.53876	0.662325	1.56456	1.64477	0.652485	1.04735	0.952648	2.66241	3.58615	2.88106	2.73332	2.61834	1.71377	2.94632	2.83022	1.91577	2.01116	2.36797	1.5656	2.08577	2.27887	1.97404	2.2801	2.78177	0.73639	1.08e-06
P11247_Mpo	0.754771	0.794588	2.18958	1.20541	0.555223	1.56563	1.34578	0.310769	8.68913	12.4817	8.93132	7.73283	4.70282	7.07444	9.03298	10.5394	12.6449	5.63555	5.21566	4.78086	8.13599	5.18704	5.25453	11.5176	8.81023	0.618036	1.14e-05
P11862_Gas2	0.72529	0.98402	1.57128	0.86797	0.871341	1.08208	1.01598	1.31324	1.74314	1.83096	1.17808	1.75145	1.99146	2.24429	1.83833	1.84804	1.79471	1.77242	2.44729	2.30859	2.38335	2.19779	2.49616	2.24232	1.83465	1.24027	1.51e-06
P12791_Cyp2b10	0.912652	1.16507	0.75336	1.01247	0.84126	0.987528	1.90566	2.81784	3.2269	3.57594	3.46621	4.44055	3.37603	3.88787	3.95745	2.96546	2.80889	3.8233	5.3872	4.1911	3.69267	5.25704	4.77333	4.43497	3.52108	1.22492	4.48e-07
P13516_Scd1	1.41408	2.225	1.00429	0.713341	0.672565	0.995712	0.832262	3.20882	4.32487	4.11989	2.74571	3.66785	3.21139	2.7894	3.58324	3.45226	2.47969	2.56345	2.74457	2.82324	2.2603	3.5024	3.04905	3.35835	3.51775	0.791387	3.07e-05
P13597_Icam1	1.39321	0.494899	1.90631	0.597346	1.32212	0.777802	1.2222	0.380371	1.97869	2.1716	1.9296	1.82865	1.98302	1.38776	2.08983	0.780325	2.50377	1.48976	1.1295	1.88292	2.19429	1.42058	1.62352	1.43412	1.95414	0.796584	0.0144109
P13634_Ca1	0.856896	1.78997	1.16375	0.810094	1.09115	0.712274	0.908851	3.61664	1.33874	0.975469	1.23782	1.70349	1.42607	1.40425	1.10337	1.41664	4.62218	1.82621	3.37314	3.48174	2.47572	1.35252	2.07979	1.82421	1.37149	1.66078	0.0149073
P14234_Fgr	3.117	3.08146	1.29099	0.674695	0.656512	0.70901	2.19264	0.540815	6.78997	9.35738	9.77919	6.83561	7.16282	6.31041	8.207	5.54818	10.3272	5.43528	4.8656	4.60049	4.90197	4.52069	5.92236	9.74214	6.99921	0.738458	7.81e-06
P14901_Hmox1	0.784194	0.516933	2.69519	1.52479	2.03505	0.85229	1.10545	0.894545	3.0593	8.36979	4.14428	4.88914	3.61162	4.05315	5.03044	5.00912	4.45418	3.01288	3.89102	3.2489	2.8829	3.27704	4.7438	4.94327	4.51671	0.793505	4.39e-05
P15392_Cyp2a4	0.299167	0.51912	2.84187	0.824795	1.22228	1.33487	0.840521	1.15948	2.26022	1.43234	0.777206	3.05692	0.295973	2.39183	1.5277	1.916	1.24598	1.7718	1.78168	3.47405	3.96686	2.49518	2.46654	4.03845	1.72185	1.44081	0.0183373
P17918_Pcna	0.914515	1.3937	0.713207	1.43512	1.13583	1.08549	0.591434	0.607759	1.48893	1.56615	1.73793	2.08857	2.33583	1.70253	2.96665	2.71169	3.94539	1.99675	2.29689	2.82293	2.84575	2.60238	2.13025	1.83456	1.91325	1.28035	8.59e-05
P19324_Serpinh1	0.724414	0.904261	1.20925	1.25643	1.2031	1.09574	0.817415	0.517022	7.27817	5.26259	3.99863	5.07086	4.70042	5.0204	5.43338	5.45582	4.37087	3.87834	3.62114	4.08195	3.98495	5.09599	3.97016	4.54019	5.16673	0.780658	5.73e-10
P19973_Lsp1	1.37561	1.15028	1.60786	0.688747	1.65045	0.849718	0.420477	0.639799	15.6755	15.4304	13.9297	12.0743	9.3136	10.4303	14.3391	12.1039	15.0693	10.3224	10.316	8.29596	13.2958	12.3211	9.27447	10.7129	13.0168	0.808005	1.06e-09
P20852_Cyp2a5	1.34683	0.960837	0.367244	0.806569	0.520933	1.03916	1.32124	1.58693	0.832091	1.10213	1.16893	1.83838	1.66796	1.9923	2.11083	1.50276	1.87833	1.7793	1.74255	2.03811	2.43215	1.47272	2.56272	2.2303	1.58536	1.23519	0.000785491
P26450_Pik3r1	0.88293	0.613096	2.36107	1.11707	0.76261	0.869418	2.39017	1.41214	1.6461	2.23934	3.32812	2.72287	3.732	2.02403	3.22865	2.94762	2.82671	3.23365	2.21258	2.41593	1.87158	2.097	1.60319	2.64719	2.83524	0.816246	0.00163915
P27889_Hnf1b	1.91113	1.29791	0.890068	1.16818	0.764188	0.966062	0.7746	1.03394	2.78989	2.08503	1.85437	2.21827	2.79736	2.12849	3.87063	3.31885	3.0242	2.08523	1.74758	1.5557	1.97836	2.32637	0.825044	3.37768	2.50408	0.811395	0.00102363
P28076_Psmb9	0.943826	1.44817	1.05617	1.48266	0.776029	0.726129	0.606265	1.36589	1.6052	1.34195	2.47273	1.85784	2.1917	2.02149	1.89731	1.71104	3.23531	2.27499	1.5504	1.08374	1.11506	0.743093	1.26698	1.58286	1.87757	0.75027	0.0276564
P28650_Adss1	1.15368	0.92578	1.12978	0.752387	0.850134	0.834971	1.07422	1.37371	1.16599	1.42078	1.4488	1.93949	1.64411	1.52633	1.42624	2.20796	2.13209	1.93816	2.36944	2.16759	2.62338	2.06034	1.63484	1.66412	1.48757	1.40916	9.52e-06
P28653_Bgn	0.826144	1.05201	0.931714	1.15734	1.40737	1.31025	0.752283	0.94799	6.52788	5.74951	4.3639	4.72858	4.61266	4.65126	4.72461	4.68592	3.5433	3.29549	3.78116	3.17482	5.18889	4.42328	3.57705	4.34041	4.70526	0.781912	1.04e-09
P28666_Mug2	1.10919	1.24156	1.09928	0.670993	0.774599	1.30104	0.887977	0.900722	2.03127	2.53001	1.4151	1.71821	1.83352	1.87194	1.5531	2.22963	1.2181	1.16442	1.3018	1.31481	1.73675	1.56037	1.58794	1.64093	1.85273	0.775929	3.08e-05
P31428_Dpep1	1.1939	1.41284	0.397282	0.700468	1.08972	1.36229	0.645819	0.910277	2.57742	2.20036	2.37697	0.975329	2.33695	2.15926	1.46695	1.75554	1.10459	0.973663	0.991239	1.45132	2.7126	2.40854	1.50522	1.43894	2.17981	0.662961	0.00660854
P31725_S100a9	1.08357	0.916433	3.64395	2.09908	2.04499	0.383217	0.696476	0.367656	42.2266	50.5548	44.326	48.358	23.9364	35.8881	47.7827	68.141	76.8469	31.9107	24.8179	25.4875	49.3683	29.6153	29.7185	66.0063	46.0543	0.669093	1.08e-05
P35276_Rab3d	1.24445	1.14948	0.922934	1.07819	0.746991	1.01562	0.651427	0.984379	2.62424	3.02966	2.34989	2.66826	1.61445	3.04837	2.93715	2.46967	2.1572	1.94342	1.45369	1.86639	2.21416	2.03075	1.87896	2.76421	2.64625	0.750907	4.49e-07
P37804_Tagln	0.649647	1.29942	1.34744	1.36272	1.00804	0.991956	0.924776	0.594412	1.80927	1.63493	2.20001	2.79565	1.61255	2.54429	2.07526	2.79955	3.88198	3.84295	2.90364	3.67978	3.01743	3.98821	2.00979	2.22135	2.13763	1.5665	3.16e-06
P40694_Ighmbp2	0.249679	0.982579	1.59794	1.03956	0.933293	1.01742	1.11711	0.917783	1.5554	1.18016	1.28957	1.00673	1.60198	1.44908	2.0299	1.95312	1.07881	1.07673	0.631582	1.07561	0.45312	1.11223	0.608715	0.56981	1.50224	0.568217	0.00307158
P45377_Akr1b8	0.927762	0.940199	1.50074	1.07781	1.38273	0.923585	1.0598	0.780125	1.2992	1.30394	1.65822	2.13358	1.12627	1.40093	1.48288	1.9529	2.32366	1.90747	1.89439	1.44475	1.98614	2.0065	1.48811	1.58601	1.4419	1.31835	0.000559172
P47226_Tes	1.1086	0.28383	0.334865	1.05637	0.943632	1.29019	1.34371	0.774454	2.8569	3.31365	2.44407	3.0455	3.12311	2.60202	3.90421	2.23438	4.85976	2.34604	1.31804	1.93235	1.69065	2.66357	1.86355	1.80025	2.9512	0.64311	0.000181728
P49615_Cdk5	1.0574	1.56349	0.675593	0.973375	0.548447	1.16109	1.02663	0.927719	1.3115	1.69732	1.06597	1.21602	0.213577	1.40956	1.32449	2.05593	2.22917	1.79588	1.80204	2.17792	1.78078	1.97566	2.05004	1.89346	1.31799	1.46781	0.000286156
P51437_Camp	0.866696	1.02328	1.70073	1.00975	0.990253	0.539637	0.563569	2.27607	10.5516	16.8103	14.4286	10.4301	6.99108	8.69265	12.8507	15.6963	20.2322	9.41457	7.3195	7.70721	14.0975	8.10205	8.69766	17.9461	11.7011	0.773952	1.35e-05
P51880_Fabp7	0.834181	0.885931	1.13091	1.11407	1.28552	0.63882	3.24784	0.495345	1.03577	1.68843	0.852598	2.03212	1.24664	1.1447	1.76496	2.25377	4.38219	2.82748	2.78923	2.8974	2.66972	1.78723	2.45493	1.85195	1.46753	1.85991	0.00271131
P52019_Sqle	0.505891	0.647994	1.40666	0.897233	1.9184	1.33789	0.51488	1.10277	4.33325	5.32146	2.01357	2.90613	3.2463	2.15904	3.22035	3.31305	2.13467	2.24048	1.67611	1.97164	2.14676	2.53205	1.75628	2.84754	3.23332	0.66208	5.17e-05
P52293_Kpna2	1.01754	1.00505	1.14284	1.19885	0.9633	0.950327	0.85389	0.994949	1.15264	1.51618	1.39763	1.37997	1.29782	1.66033	1.61546	1.55787	1.24656	1.29531	1.05889	1.27294	1.17349	0.968162	1.0919	1.40276	1.45691	0.830543	7.83e-05
P53690_Mmp14	1.2252	1.36407	0.882628	1.00067	0.999334	0.815668	0.679624	1.58844	1.38555	2.20599	1.75589	1.44719	0.520792	1.49423	1.74931	2.22218	0.784346	1.23707	0.224921	0.787202	1.06002	1.12048	1.06525	1.65655	1.62177	0.655231	0.0321123
P53798_Fdft1	0.891849	0.458521	1.10815	0.766607	1.97579	2.52522	0.79804	2.20911	7.4948	12.8492	2.5005	3.73461	6.66282	2.76014	6.22535	5.55471	4.35296	2.73819	2.50318	2.75788	2.48838	5.05487	2.97772	3.10901	5.89003	0.48689	0.00161954
P56959_Fus	1.14057	0.856429	1.04661	0.922977	1.18274	0.953389	0.745682	1.23515	1.97058	2.19869	1.8977	2.0994	2.03841	1.40204	1.95343	1.57132	2.12903	1.6693	1.38534	1.46252	1.33268	1.45591	1.36293	1.31666	1.96201	0.724067	7.67e-06
P57784_Snrpa1	0.93234	0.966505	1.0335	0.849788	0.876621	1.094	1.05877	1.1793	1.57694	1.50817	1.31974	1.14771	1.56056	1.43203	1.49838	1.27587	1.17038	0.964298	1.11661	1.19936	1.06178	1.03663	1.14374	1.16105	1.46521	0.771342	8e-06
P58058_Nadk	1.06266	0.794486	0.889412	0.996155	0.929718	1.13788	1.03532	1.00385	1.26094	1.49968	1.03725	1.75533	1.38498	1.71651	1.44793	1.82297	2.02594	1.7626	1.80312	1.46275	1.8294	2.13386	1.72673	1.69173	1.47381	1.20969	1.82e-06
P58774_Tpm2	0.986868	1.89685	1.01313	1.12928	0.944855	1.16995	0.896462	0.658621	2.44151	2.18294	1.05215	1.67477	2.11714	2.58771	2.06866	1.79398	2.02526	2.13497	3.53847	3.17619	3.07681	3.12013	1.86317	1.96421	2.0929	1.24511	0.000113899
P59438_Hps5	1.03833	1.28399	0.705016	0.961674	1.07523	1.26105	0.600651	0.357728	2.18841	2.05559	1.89498	2.06886	3.86318	2.46398	2.36454	3.60331	2.46643	2.11383	1.12516	1.56606	1.50457	1.30609	0.804349	2.20355	2.27647	0.674427	0.000141276
P61079_Ube2d3	0.801032	0.415893	0.479658	0.986669	1.30211	1.44173	1.75367	1.01333	2.38845	2.87749	1.44929	4.05678	1.83423	3.42398	1.78433	3.53324	3.46519	3.64266	3.84748	3.22438	3.17807	3.45789	2.46024	3.24871	2.63297	1.27358	9.02e-06
P61957_Sumo2	1.77487	0.6085	1.68697	0.804102	0.114405	0.48832	1.1959	2.96514	1.19895	1.76202	2.91601	3.06067	2.85941	2.64292	3.3805	2.76479	4.57454	4.71925	4.86154	2.83677	2.79852	3.77542	2.28003	4.33179	2.8121	1.44148	0.000133542
P63085_Mapk1	1.5814	1.33049	0.316982	0.226429	1.44969	0.491651	1.10487	0.895128	1.50915	1.49251	1.37297	1.81585	1.53534	1.24785	1.53719	1.86355	1.81008	2.65306	1.89221	1.95842	2.03864	1.81328	1.76243	1.99138	1.52225	1.26478	0.00011597
P63147_Ube2b	0.8755	0.53545	1.41058	1.1245	1.20399	0.68754	1.12466	0.689251	0.955921	0.995484	1.16505	1.5838	1.20286	1.75653	1.28686	1.82496	2.01076	1.68848	1.21449	1.50444	1.596	1.90744	1.49927	1.57456	1.24486	1.27347	0.00179042
P63213_Gng2	1.14671	1.01783	0.756688	0.982174	1.22258	0.877591	1.40243	0.694604	5.85726	6.12106	5.14937	4.15778	4.53024	4.09868	4.70642	5.27031	4.80288	3.48792	3.94675	3.22505	4.26973	3.88308	2.80106	4.99578	4.92789	0.794441	1.95e-09
P70158_Smpdl3a	0.975527	1.1082	0.772251	0.934452	0.673978	1.14413	1.28428	1.02447	3.66071	3.27213	3.95769	1.75967	3.38003	2.57794	3.14439	2.96463	2.71847	2.48173	2.35962	1.48038	2.78871	1.52981	1.49033	2.70959	3.20826	0.754513	2.65e-06
P70336_Rock2	1.01503	0.980379	1.55339	0.660962	0.98497	1.30561	0.887328	1.87137	2.14281	2.83235	1.88597	3.46262	2.77467	2.74294	3.26818	4.09091	3.69008	3.81418	4.33949	3.48141	3.32773	3.25561	3.35405	3.30428	2.80351	1.21909	1.56e-07
P82198_Tgfbi	1.16495	0.609169	0.793179	0.674913	0.835046	1.17515	1.59682	1.63808	4.59933	3.67623	2.99235	3.36714	2.75915	3.25444	3.42622	3.96152	2.85618	2.50687	2.23919	1.86437	2.71681	2.84965	2.36266	3.00647	3.39668	0.768938	3.91e-08
P97792_Cxadr	1.05149	0.963125	0.95628	1.03244	1.11721	1.18831	0.967559	0.87814	1.78992	1.47772	1.56671	1.2277	1.51056	1.66274	1.46273	1.17771	1.27481	0.881663	1.11732	0.986334	0.941845	1.17287	1.45038	1.12542	1.49414	0.750514	0.000133056
P98064_Masp1	1.44645	1.30134	0.797332	1.42116	0.87985	0.597842	0.369606	1.12015	2.37061	2.60009	2.24867	2.38119	3.3253	2.03527	1.66522	1.56873	1.57267	1.65131	1.58174	1.31882	0.464942	2.14874	2.45311	1.9027	2.30964	0.699903	0.000768525
Q01730_Rsu1	0.860394	0.991741	1.08381	1.08463	1.15399	0.981738	1.00826	0.867881	1.2861	1.28266	1.58984	1.58816	0.861343	1.33649	1.33839	1.4521	2.28736	1.58739	1.74419	1.65287	1.3537	1.74931	1.76543	1.25239	1.33744	1.26998	0.000132826
Q04857_Col6a1	0.981786	1.01821	0.704833	1.19628	1.25558	1.35081	0.876544	0.90318	3.59191	2.47164	2.52761	2.10358	2.25794	3.15481	2.25296	2.08797	1.66148	1.78126	2.05065	1.88537	2.29367	2.58385	2.10848	1.88825	2.36479	0.832823	1.66e-06
Q3TC93_Hs1bp3	1.7282	1.28853	0.809249	0.51857	0.895828	1.02247	0.977533	1.03841	1.52152	1.82644	1.94269	1.86041	1.72336	2.22695	2.12807	2.68018	2.66063	2.73177	2.27204	1.88522	2.79232	2.23329	1.83593	2.43121	1.90155	1.23669	4.62e-06
Q3TEA8_Hp1bp3	0.978687	1.02131	0.883929	1.03991	0.838725	1.26988	1.21745	0.926141	1.95442	1.35677	1.41653	1.59255	1.53986	1.60284	1.47097	1.58462	1.42106	1.2024	1.14053	1.32553	1.21146	1.34519	1.23374	1.45501	1.56224	0.819104	9.5e-06
Q3THF9_Coq10b	1.2389	1.54874	0.400685	0.870181	1.04237	0.621273	0.957631	1.80098	2.45046	1.78876	2.05878	2.87188	2.96217	1.99762	2.89136	2.55691	2.49459	3.1782	3.23227	3.79199	3.36336	2.16431	3.66988	2.38884	2.50369	1.28021	2.69e-06
Q3TIX6_Fubp3	0.657396	1.00299	1.09271	0.80314	0.65236	1.10069	1.14153	0.997011	1.32453	1.94889	1.29211	1.13649	1.81655	1.10676	1.69932	1.37147	1.44901	1.24357	0.952094	0.638402	1.05571	0.913808	1.52311	1.17303	1.348	0.826684	0.00571582
Q3TKT4_Smarca4	1.13216	1.22446	0.867838	1.423	0.502766	1.17934	0.365112	0.295564	1.61729	1.33573	1.02221	1.11667	0.956616	1.28007	1.52424	1.3725	0.867768	0.857651	0.903333	0.793161	1.04572	0.871442	0.837353	1.15135	1.3079	0.664886	0.0337347
Q3TW96_Uap1l1	0.979539	0.966188	1.6343	1.11791	1.15326	0.964426	1.02046	0.781217	10.5791	10.4724	14.7385	16.3481	10.7298	14.0605	13.5015	18.7797	24.0637	18.4985	14.3364	16.6769	15.2024	16.4211	15.406	16.7856	13.781	1.20085	1.09e-09
Q3TYS2_Cybc1	0.932331	0.961638	1.34906	1.48431	1.19429	1.02556	0.223362	0.974435	2.30831	2.40424	2.53895	1.6134	2.18463	1.5047	1.99495	1.62647	1.65697	1.78854	1.48051	0.883998	1.6996	1.34005	1.57792	1.64211	2.08979	0.770422	0.000187142
Q3UQ28_Pxdn	0.750494	1.00136	1.78166	1.30261	1.24607	0.998639	0.793788	0.654319	13.106	9.68743	8.30403	11.3268	9.87679	7.5137	12.7796	10.3712	10.0171	6.76402	8.21672	6.49784	8.6209	8.45498	4.84804	8.38744	10.124	0.820042	2.29e-09
Q3URQ0_Tex10	0.977399	0.760785	1.06682	1.19209	0.845799	1.0226	1.03986	0.853989	2.33224	1.88185	1.43646	1.52239	2.13001	1.98171	1.99048	1.76412	1.40701	1.48056	1.27999	1.4602	1.55437	1.39455	1.47785	2.17873	1.93178	0.760451	6.44e-06
Q3USZ8_Dipk2a	0.818333	0.800565	1.36275	1.57046	2.58932	1.12789	0.872108	0.245852	2.59789	2.92553	2.18006	1.77852	2.55755	2.12074	2.85869	1.81855	1.5657	1.90409	1.6264	1.81406	1.80639	1.86228	2.13757	2.17448	2.36881	0.77599	0.000954123
Q3V1T4_P3h1	1.02073	1.17395	0.909341	0.979266	1.16576	1.21661	0.776243	0.356168	3.38147	3.86153	3.21927	2.01813	3.88169	1.70425	3.08512	2.86147	2.70741	2.19294	2.17963	2.04874	1.58539	2.40407	2.22314	1.44411	3.15219	0.693576	4.37e-06
Q497V5_Srbd1	0.994549	0.682757	1.09603	1.35552	1.00545	1.52284	0.705606	0.637743	2.01967	2.07825	1.10643	1.41258	1.13684	1.28124	1.51834	1.15086	0.85287	1.12111	1.23989	0.778247	1.07454	1.20165	1.15832	0.896599	1.34691	0.81507	0.0192812
Q58NB6_Dhrs9	1.66435	0.220801	1.16562	1.2214	1.19234	0.690683	0.434818	0.834382	7.71468	7.16777	5.08828	4.14571	6.14996	3.93282	5.91189	5.63788	5.54451	2.70086	3.65557	2.35618	4.05367	5.35051	6.33474	8.05085	5.77489	0.81423	6.95e-06
Q5DTI6_Kansl1l	0.101516	0.105778	1.22046	0.440286	0.779537	1.39612	3.02961	6.69716	32.0246	64.5541	28.8831	24.8687	34.3004	43.1647	38.1434	50.5218	33.348	33.5618	46.2398	44.9292	45.8928	42.3129	44.5696	45.6449	36.2219	1.23542	2.43e-08
Q5KU39_Vps41	1.0104	1.3115	1.01858	0.94644	1.27933	0.989598	0.922055	0.265152	2.67684	2.89422	2.48993	1.65895	2.2934	1.84286	2.30411	2.69022	2.17161	1.96658	1.60117	1.67215	1.46438	1.85826	1.81642	2.52427	2.39702	0.766511	3.54e-06
Q5U431_Gpr39	1.19949	1.14456	0.339217	0.855444	0.619957	2.07879	1.72656	0.589832	3.7813	6.03708	4.38001	5.19103	4.24689	4.24501	3.8213	3.98801	3.33853	3.51837	3.42003	2.85139	2.79346	3.85487	3.10719	3.32053	4.24595	0.784166	1.3e-08
Q60648_Gm2a	0.95743	1.17717	0.75906	1.04257	0.695423	0.944766	1.30266	1.11474	2.02962	1.99703	1.69716	2.28278	1.38368	1.91392	2.32348	1.97137	3.02487	2.02167	2.16261	2.80288	2.80634	2.83683	2.63335	2.59621	1.9842	1.36988	2.14e-08
Q61001_Lama5	0.64996	1.07425	0.604648	0.853945	1.14695	1.28176	1.11045	0.925747	2.41483	1.90493	1.75467	1.66611	1.75283	1.70818	2.00724	1.73036	1.29554	1.41813	1.37984	1.37845	1.77181	1.50459	1.2841	1.55084	1.75375	0.797711	1.39e-06
Q61024_Asns	0.757507	0.561944	2.6334	0.603674	1.52791	0.820887	1.53352	1.17911	3.14645	3.49362	5.32324	2.04186	3.63561	4.00717	3.50105	7.66503	9.48786	6.10808	6.15614	4.35086	7.31533	5.64139	1.95269	6.03877	3.56833	1.70203	0.000140147
Q61553_Fscn1	0.642593	0.820294	2.14616	1.59823	1.25674	1.17846	0.687482	0.821537	3.42402	3.71721	2.50967	4.034	3.31426	3.87224	4.50251	4.11678	3.98734	3.93098	2.55632	3.15415	3.04853	2.77593	2.82629	3.55045	3.79473	0.817276	1.48e-07
Q62376_Snrnp70	0.885244	0.945422	0.790085	1.03468	0.965321	1.3665	1.82209	1.23632	1.78474	1.58544	1.3251	1.39131	1.2885	1.32417	1.51371	1.47743	0.903662	1.00942	1.2491	1.20779	1.17954	1.16667	1.14186	1.12676	1.43437	0.80472	0.0163006
Q63961_Eng	0.728436	0.870001	0.669005	1.13083	1.46932	1.29444	0.998765	1.00124	2.02859	1.57773	1.40977	1.42614	1.12267	1.1778	1.51543	1.25754	0.93918	1.06987	1.06795	1.04152	1.08982	1.31008	1.21434	1.0893	1.41796	0.761366	0.00837937
Q64449_Mrc2	1.0262	0.985216	1.30846	0.773278	0.585345	0.25193	1.51076	1.01478	7.04669	5.66904	5.58061	5.94506	5.02237	5.46221	6.13551	6.13584	5.94726	5.05547	3.92316	3.81858	4.5692	4.87173	4.33014	4.84129	5.80705	0.810264	2.65e-11
Q64523_H2ac20	1.37958	1.02125	0.953841	0.917921	0.947612	1.08032	1.06873	0.978752	1.87229	1.69781	1.35591	0.926481	1.45413	1.35643	1.41451	0.90507	0.875262	1.15296	0.909944	0.990549	1.33022	0.96155	1.00224	1.23591	1.38547	0.719175	0.0235983
Q64669_Nqo1	0.940908	1.36498	1.40276	0.787709	0.525438	1.07304	0.866168	1.05909	2.27017	2.36752	3.19706	4.58089	3.16761	3.27094	2.04275	4.43025	7.17829	3.69809	4.63077	4.06918	4.37823	5.35507	4.10112	4.07538	3.18234	1.33225	9.01e-07
Q66JW3_Tox	1.0333	1.11818	0.847201	0.966704	0.648145	1.19886	0.726586	1.1047	1.38608	1.63823	1.35929	1.21474	1.18097	1.31902	1.56554	1.30484	1.13792	1.42228	1.07031	1.52259	1.02336	1.23951	0.964382	0.967942	1.33916	0.824484	0.00230358
Q69ZQ2_Isy1	1.06079	0.701048	0.683758	1.1629	1.05938	0.940625	0.631799	1.30046	1.74982	1.30296	1.17678	1.46932	1.11032	1.42915	1.55371	0.944993	1.35738	1.00741	1.09064	1.0077	1.03799	1.0041	1.0136	1.08036	1.36605	0.75092	0.0085593
Q6A028_Swap70	0.629773	0.655895	2.01863	0.809489	1.33636	1.15811	1.04859	0.951411	1.57409	0.177881	1.59639	2.8731	1.59347	1.53373	3.60223	3.68642	3.47138	2.23109	3.14247	2.60915	2.57838	2.52133	1.06423	1.64983	1.59493	1.59872	0.0244446
Q6DID3_Scaf8	0.872461	0.913664	0.982677	1.21124	1.4555	1.00207	0.997927	1.10082	1.73391	1.94411	1.52488	1.74154	1.58563	1.53796	1.6403	1.67848	0.984709	0.741426	1.1607	1.3111	1.04663	1.22469	1.23672	1.33548	1.65939	0.718756	4.95e-06
Q6P5D8_Smchd1	0.859455	1.35952	1.08381	0.916194	1.49547	0.411671	0.780209	1.97028	2.9832	2.48247	2.35025	2.98973	2.60438	2.22036	2.57159	1.83858	2.67635	1.69694	1.5043	1.57457	1.48046	1.07455	2.04147	1.74572	2.52703	0.647302	5.55e-05
Q6P8I4_Pcnp	0.349936	0.78429	1.48163	1.29082	1.18404	0.739705	1.22732	0.815957	1.21125	0.928339	0.806549	1.81771	1.18534	1.52161	1.45246	1.5354	2.85216	1.33372	1.59106	1.85538	1.93408	2.25399	1.12888	1.6531	1.33185	1.31714	0.00519536
Q6P8Q0_Gm3776	1.00865	1.41126	1.04224	0.92761	0.673552	1.39128	0.988412	0.991353	2.85387	2.64675	3.4909	4.42389	3.94967	3.44438	3.52024	4.08516	6.31832	4.19722	4.99662	4.19007	4.57309	5.116	4.64484	4.14693	3.50557	1.31476	1.31e-09
Q6PE54_Dhx40	0.849836	0.79949	0.821412	1.15016	1.33835	1.50909	0.40687	1.74594	1.86176	2.73737	1.77199	1.20199	0.936409	1.23187	1.97218	1.31259	1.06942	1.02091	0.664994	1.13056	1.05903	0.863892	1.11255	0.353231	1.54229	0.6743	0.0181673
Q6VNB8_Wdfy3	1.33482	0.409221	0.879375	1.29344	1.20989	0.953339	1.04666	0.829319	3.14843	2.78979	1.64798	2.81315	2.03954	1.79679	2.49835	2.24687	3.12522	2.38546	1.36883	1.82587	2.00612	2.17485	1.06557	1.74909	2.37261	0.807548	0.000197657
Q6ZPR5_Smpd4	0.697318	1.03453	0.740116	0.965471	0.830044	1.35434	1.28442	1.29284	1.40201	1.30043	1.04541	1.1932	1.23767	1.23474	1.33887	1.32069	0.640171	0.76062	0.893421	0.756126	1.18076	0.933695	0.923688	0.96508	1.26905	0.715933	0.00462628
Q6ZQ93_Usp34	0.89731	1.06397	0.954457	0.777605	1.06244	1.24725	0.800826	1.04554	1.76497	1.83462	1.47619	1.58749	1.52067	1.62907	1.77462	1.12781	1.49532	1.46011	1.13822	1.28617	0.991452	0.634793	0.868355	1.91793	1.60828	0.753724	0.00249693
Q6ZWR6_Syne1	0.815433	1.07309	0.993287	1.00671	1.15075	1.04402	0.708785	0.705082	1.60153	1.28506	1.22758	0.973297	1.50015	1.32725	1.55479	1.67477	1.75098	1.0703	1.14466	1.07475	0.722586	1.00561	1.17594	1.01477	1.4137	0.758665	0.00623812
Q7TSE6_Stk38l	0.646956	1.18246	0.817543	0.784856	1.33642	1.19722	0.733628	1.26483	1.13667	1.46649	2.38255	1.6779	1.30497	2.19433	2.29447	2.07597	2.27576	0.689749	1.03879	1.68597	1.49492	1.37303	1.00907	1.39216	1.87694	0.736624	0.00643409
Q80W94_Mogat2	0.94278	1.0517	0.9483	0.316471	1.2854	1.53447	1.51661	0.868222	1.0192	2.17321	1.2575	1.41849	1.17141	1.82934	1.86826	1.16356	3.21193	1.41193	1.66569	1.93439	2.04793	2.40344	2.63887	2.76374	1.338	1.66344	0.000564931
Q80X19_Col14a1	0.728586	1.16847	0.888566	0.83746	1.49817	1.1508	0.921875	1.07813	7.07866	6.30576	5.24032	5.84953	4.77127	4.88869	5.20205	6.61302	4.50966	4.5303	4.55105	3.54102	5.62979	5.42692	4.18696	5.48969	5.54493	0.818888	3.34e-10
Q80YX1_Tnc	1.01776	0.766926	1.54269	1.43324	0.936345	1.53248	0.982236	0.53109	5.5183	4.15691	3.06377	2.81916	2.77773	2.84392	3.08617	3.83076	2.38823	1.94604	1.93815	1.28773	2.45281	2.80543	2.25874	3.25618	3.07497	0.755614	1.15e-05
Q8BG60_Txnip	1.90616	0.67811	0.86334	0.588356	1.41237	1.32485	1.13666	0.846668	2.22434	1.42288	3.37263	3.63257	2.15712	2.48114	3.31026	4.41959	4.65172	3.53347	3.51636	2.36115	3.5993	2.91627	3.32867	3.59748	2.8957	1.2173	1.95e-05
Q8BG81_Poldip3	1.43299	1.06045	0.2467	0.729749	0.572691	1.04288	1.07852	0.957125	1.47226	1.70792	1.81147	1.68495	1.94535	1.48676	1.69129	1.43994	1.5933	1.42234	1.26923	1.37251	1.29857	1.35469	1.4325	1.50118	1.68812	0.827799	3.6e-05
Q8BGW1_Fto	0.926102	0.621915	1.17443	1.0739	1.74588	0.924258	1.10156	0.665507	1.74504	1.62447	2.05629	2.17135	0.887966	1.5029	1.90654	2.47336	3.52912	2.35498	1.84664	2.43472	2.25589	2.24135	1.6254	2.19345	1.82579	1.23159	0.000254713
Q8BH64_Ehd2	0.834515	0.530991	1.27926	1.46493	1.07759	1.41772	0.89379	0.922413	1.65668	1.2252	0.239245	1.65091	1.14992	1.63847	1.84532	2.67373	1.43494	2.20722	2.58653	2.01112	1.4708	3.88427	2.09586	1.48515	1.64469	1.24856	0.0162187
Q8BH79_Ano10	0.46455	0.705122	1.40444	1.71333	1.71366	0.956289	1.04371	0.666842	2.8155	2.98495	2.73391	1.72305	2.20851	1.70516	2.52006	2.29037	2.3259	1.08721	1.36911	1.5585	1.12454	1.87275	1.84787	1.88895	2.40522	0.708122	0.00019782
Q8BHS3_Rbm22	1.7611	0.741939	1.48266	1.7136	0.860934	0.706061	0.666827	1.13907	1.73788	2.55088	1.61703	1.55976	1.84676	2.80621	1.07645	2.6313	0.9939	1.42509	1.47197	1.55545	2.46816	1.43334	0.891472	1.75059	1.79232	0.810489	0.0230707
Q8BIS8_Ccdc126	0.878213	0.582202	1.50009	1.92231	1.1402	1.12179	0.489203	0.83152	3.57545	3.65792	1.32086	2.20678	2.65416	3.11101	3.61689	3.23488	2.91541	1.68295	2.02641	2.15692	3.30762	2.36426	1.15503	1.88137	3.17295	0.659218	0.000204739
Q8BKG3_Ptk7	1.12993	1.44715	0.87007	1.27845	0.559468	1.24849	0.782721	0.751088	7.88407	5.25468	5.69617	5.96134	6.21166	6.52347	6.66536	6.00797	5.20068	4.96432	4.57241	3.25684	6.15954	4.61723	2.22128	5.32857	6.10981	0.784112	4.6e-09
Q8BLN5_Lss	0.945555	1.02091	0.966591	0.97909	1.22357	1.23508	0.66268	1.21757	5.37789	6.17907	2.94358	3.74861	5.5405	2.66167	4.66888	5.3515	3.89432	4.00426	3.41309	3.0246	3.95421	3.95365	2.90092	4.32524	5.01019	0.783201	4.17e-07
Q8BMC4_Nop9	0.892481	1.35843	1.07682	0.923183	1.25631	1.43282	0.327316	0.878755	2.38618	1.28158	1.70997	1.92866	0.776609	1.45949	1.92144	1.77557	1.95201	2.30966	2.21338	2.61157	1.8487	2.28222	2.28528	2.37508	1.74277	1.31041	3.1e-05
Q8BR63_Fam177a1	0.99528	1.46771	0.991138	0.293547	1.00472	0.579706	1.70206	1.75472	3.26592	2.5669	1.74039	3.19491	2.777	1.658	2.56684	1.67021	2.36696	0.626788	0.614402	1.62362	0.874169	1.28071	1.49113	1.20156	2.56687	0.48352	0.000764118
Q8BRH0_Tmtc3	1.10582	1.03217	0.96299	1.48532	0.557964	1.06167	0.967825	0.610966	1.55308	1.44312	1.22236	1.18788	1.31738	1.5286	1.49341	1.38381	1.14425	0.723954	0.945893	1.1648	1.35688	1.0843	1.13527	1.0198	1.41347	0.785151	0.00426329
Q8BU03_Pwp2	0.95484	0.949337	1.2973	1.10625	0.739591	0.913127	1.88078	1.04516	1.77568	1.65606	1.80664	1.89597	1.93833	1.79035	2.27906	1.78541	1.03828	1.28249	1.27205	1.19551	0.610456	1.26633	1.4443	1.80208	1.79849	0.705696	0.000301768
Q8BUR4_Dock1	0.947047	0.392275	1.19021	1.03995	1.0103	0.989701	1.17436	0.638874	1.71028	1.95236	2.3994	2.87457	2.03165	1.89243	3.56322	3.6434	3.32422	3.3134	2.24852	2.57133	3.08687	2.33287	2.70936	3.77323	2.21552	1.3081	5.4e-06
Q8BYW1_Arhgap25	1.11204	1.16781	1.06885	0.92783	1.3167	0.931151	0.654487	0.304392	2.45766	2.99853	2.8361	2.38433	1.78576	2.70627	3.30135	4.20064	5.36934	3.06237	3.80076	2.64294	3.86352	3.69398	2.98521	3.69288	2.77118	1.3328	1.11e-06
Q8C079_Strip1	0.568595	0.374684	1.30464	1.4502	1.78852	0.695361	1.8246	0.301017	1.66837	1.4584	1.44066	1.3467	1.41923	1.6526	1.93679	1.89866	1.10028	1.17237	1.3151	1.20028	1.18955	1.39288	0.743191	1.52423	1.5555	0.768189	0.0479286
Q8C092_Taf5	1.30013	0.789045	0.699889	1.20131	0.935726	0.912747	1.20854	1.06427	2.57894	2.04186	1.44778	1.25565	1.85483	1.69863	1.37341	1.63975	1.07779	0.686424	1.23517	0.892502	0.94379	0.999554	1.92196	1.05996	1.66919	0.616921	0.00166239
Q8C0E3_Trim47	0.968724	0.610288	1.13065	0.878538	1.2068	1.03128	0.79374	1.16595	2.3115	2.21899	2.35151	3.40951	2.00984	2.16008	3.03886	3.67821	3.83697	2.61849	2.73131	2.3907	2.75801	3.1672	2.93953	3.09048	2.3315	1.22186	3.35e-07
Q8C0I1_Agps	1.22294	0.874536	1.20347	0.86416	1.01782	1.16554	0.98218	0.690722	3.05288	3.33096	2.67119	2.5519	2.28462	2.3677	2.92578	1.98763	2.64833	1.87164	1.83587	1.95152	1.77988	2.22641	2.63071	2.26813	2.61154	0.799896	1.24e-07
Q8C2Q3_Rbm14	0.946546	1.27595	0.954838	0.9731	0.675321	1.0269	1.34547	1.44873	2.28609	1.87551	1.80901	1.55838	1.81984	1.47963	1.60352	1.35357	1.43391	1.40297	1.16439	1.4138	1.35898	1.44603	1.39417	1.39337	1.70626	0.819669	0.000188155
Q8C522_Endod1	0.826098	0.802503	1.09196	1.44472	1.63085	1.01186	0.618529	0.988135	4.88948	4.30037	4.46133	4.13547	4.4408	4.16612	4.60028	2.72366	3.81461	3.35904	2.8144	2.86385	3.21294	3.51225	3.64642	3.2349	4.37059	0.754354	8.93e-10
Q8C854_Myef2	1.02587	1.11927	0.974133	0.949606	0.872474	1.15593	1.08012	0.736033	2.21404	1.64009	1.96925	1.43862	1.74002	1.70492	1.55833	1.31994	1.24919	1.46644	1.28145	1.26482	1.42323	1.6723	1.2568	1.62813	1.67251	0.808571	1.78e-05
Q8C8U0_Ppfibp1	0.876716	0.992866	1.18098	1.31274	1.00713	0.533744	1.27766	0.92245	1.72495	1.22141	1.50354	1.10087	0.861213	1.09489	1.57399	1.30449	2.03107	1.61725	1.98548	1.4603	1.40401	1.19542	2.32161	1.43703	1.26295	1.2184	0.00284098
Q8CGF7_Tcerg1	1.03313	1.23935	1.04939	1.06146	0.882673	0.921228	0.966866	0.91494	1.46511	1.63689	1.55919	1.1719	1.46342	1.07044	1.34438	1.1124	1.1354	1.04808	1.05219	1.07463	1.06826	1.11039	1.14476	1.2057	1.4039	0.778199	0.000697927
Q8CHH9_Septin8	1.10436	0.958223	0.958094	1.06613	1.1075	1.03773	0.876267	0.962267	1.7328	1.36321	1.77482	1.92047	1.30527	1.21974	1.73406	1.78931	2.61297	1.87432	1.23145	1.07252	1.26981	1.6723	0.765985	1.55171	1.73343	0.813856	0.0136818
Q8CIE4_Parp10	0.995577	0.633562	0.844813	0.859689	1.17106	1.00442	1.36308	1.55122	1.54215	2.15358	2.17365	1.203	2.45087	1.74641	2.06608	2.21205	2.43401	1.96504	1.82552	1.47908	1.62869	1.14137	1.96303	1.48069	2.10983	0.818601	0.000620571
Q8CIN4_Pak2	1.00358	1.07381	1.38052	0.968694	0.953272	1.16721	0.381424	0.996422	1.06397	1.38884	1.30328	1.75122	1.30445	1.35721	1.43169	1.71026	2.66236	1.83989	1.53193	1.66628	1.92404	1.67433	1.49515	1.67664	1.37303	1.22029	0.000253914
Q8CJ53_Trip10	1.18505	0.751664	0.924904	1.10389	1.49211	0.519958	1.0126	0.987399	2.66158	3.87259	2.53808	1.60997	2.74366	1.92261	3.3719	2.23705	3.5897	3.54727	3.3652	2.77991	2.96314	3.40283	3.34004	2.35765	2.59983	1.28955	7.42e-07
Q8CJH3_Plxnb1	0.922152	1.02368	1.21613	1.17498	1.2283	0.757165	0.976321	0.362341	4.25632	3.78929	2.80551	3.16656	4.32296	3.14168	3.25939	3.71812	3.01977	2.49748	2.12192	2.04816	1.88698	1.61907	1.08356	2.4325	3.48875	0.597646	4.71e-08
Q8JZK9_Hmgcs1	1.05671	0.740022	0.943292	0.474247	1.30991	1.15259	0.630715	2.22512	4.50489	8.17925	3.94147	4.74561	5.81348	4.60208	6.34914	7.47644	6.57134	3.91426	2.70897	2.73183	2.70307	4.98369	2.59388	4.91464	5.27954	0.629419	6.66e-06
Q8K0B2_Lmbrd1	0.97576	0.564725	1.22757	1.48602	1.88277	0.78943	0.906151	1.02424	2.11553	2.03607	2.00716	2.29962	2.05339	1.44464	1.07211	1.38886	1.48261	1.24777	1.72977	1.86968	1.86159	1.41257	1.09146	1.25935	2.02161	0.716058	0.0115859
Q8K0C4_Cyp51a1	0.795813	0.782014	0.980993	1.01901	1.64092	1.33714	0.797741	1.55316	4.81847	6.61928	2.79471	3.38632	5.15617	3.00315	4.53929	4.75509	3.31705	2.74754	2.46038	2.6305	3.13138	3.46182	2.89893	3.93342	4.64719	0.648813	1.91e-06
Q8K0Q5_Arhgap18	1.51311	0.832981	0.375113	0.432042	1.67687	1.16702	1.26592	0.743287	1.66109	1.32015	1.84301	2.7191	1.96425	2.26138	2.68794	2.93026	4.96023	3.84451	3.23833	2.8607	2.96523	2.56161	2.73632	2.4665	2.11282	1.37871	1.78e-05
Q8K114_Ints9	0.543594	0.711541	1.35904	1.34774	1.28846	0.689434	1.5445	0.651984	2.19487	1.83244	1.04672	1.25036	0.655295	1.24173	1.44843	1.19293	1.41155	1.45199	1.89253	2.33129	1.97838	2.87827	2.69045	1.35292	1.24605	1.55328	0.00467836
Q8K284_Gtf3c1	0.936567	1.13129	1.00612	1.17699	0.888947	0.671275	0.993876	1.02037	1.33718	1.77428	1.56631	1.21612	0.984242	0.888684	0.942404	1.27832	0.939781	1.09913	0.522651	0.91935	0.835624	0.993849	0.929243	1.06602	1.24722	0.749277	0.0274658
Q8K354_Cbr3	1.55822	0.14558	0.963162	0.675324	1.11268	1.05868	1.03684	0.71811	8.91899	10.5424	14.4786	14.9135	10.181	15.6784	23.9695	13.0126	39.0923	20.4947	10.4625	19.6271	10.2374	8.68823	25.8425	21.449	13.7456	1.45944	9.95e-05
Q8K363_Ddx18	1.03915	0.880841	1.32125	1.09949	1.76076	0.775711	0.827842	0.960853	1.63872	1.62435	1.75352	1.46036	1.38564	1.52033	1.24656	1.0104	0.637281	1.42178	0.933299	1.30329	1.24213	1.03429	0.850521	1.30403	1.49035	0.763721	0.0340526
Q8QZY6_Tspan14	1.0317	0.943841	0.968301	1.23564	2.15221	0.812697	1.22807	0.903528	2.47656	2.37049	2.79253	2.63675	2.31471	2.06016	2.73107	1.43918	1.88214	1.10898	2.04281	1.9368	2.64669	1.22075	2.12707	2.14228	2.42353	0.821037	0.000385053
Q8R2M2_Dnttip2	0.757449	1.00903	0.990973	1.03107	1.13798	1.11107	0.693562	0.695829	2.48992	2.62928	1.56936	1.14465	2.28842	1.76559	1.18275	1.6033	0.969683	1.73588	1.78951	1.088	1.27215	1.16399	1.66264	0.56621	1.68444	0.72313	0.00272722
Q8R3N6_Thoc1	1.03018	0.943502	1.12724	0.969823	0.747014	1.04883	1.0617	0.8214	1.6495	1.45176	1.35336	1.27829	1.34403	1.6672	1.34118	1.02922	1.02766	0.906414	1.34798	1.39589	1.0408	0.548409	1.1096	1.2163	1.3487	0.797212	0.00340438
Q8R4G6_Mgat5	0.869372	1.14742	2.1242	1.11006	1.88235	0.44893	0.803093	0.889937	2.97901	2.99523	1.31797	2.31273	3.21376	2.27797	2.07627	2.20827	1.98717	1.25849	1.25463	1.24383	1.31518	1.71252	1.89495	1.81596	2.29535	0.659528	0.000670745
Q8VE10_Naa40	0.340523	0.55628	1.02933	0.970671	1.08518	0.833222	1.2875	1.15886	2.88859	2.10083	1.83483	2.22833	1.46447	2.07111	2.27104	2.30871	1.54489	1.64693	1.90667	1.68506	1.52884	1.81994	2.35014	2.4207	2.16458	0.809626	8.96e-06
Q8VHI3_Pofut2	0.919537	0.696744	1.71118	0.656477	1.4076	1.00411	0.99589	1.01182	2.43884	2.40735	1.3875	2.99666	2.68824	1.50834	2.8581	3.24955	1.40517	2.18812	1.62798	1.48672	3.21141	1.91356	2.15036	2.52756	2.56354	0.79264	0.000481307
Q91V61_Sfxn3	0.964948	1.04602	0.990372	0.802173	1.18246	1.34676	0.887514	1.00963	3.41771	3.48726	2.57711	2.26836	2.65528	3.54738	2.95821	3.39841	2.37653	2.22953	2.41635	2.87311	3.51528	2.9142	1.74934	3.2503	3.17831	0.832118	2.02e-07
Q91V83_Tti1	0.538771	0.904576	1.34125	1.09542	1.31228	1.7771	0.806019	0.308763	1.22632	1.81344	1.20297	1.68866	0.864671	1.80153	2.03146	2.1855	1.87606	1.11691	1.32548	1.46348	1.19383	1.96097	1.4449	1.45585	1.7451	0.831113	0.0366268
Q91VF2_Hnmt	1.60395	1.17695	0.918775	0.913872	0.804865	0.881601	1.28935	1.08123	1.92334	1.96132	2.01955	2.85669	2.50918	3.04599	2.35116	3.08163	3.1586	3.91042	3.23014	3.44911	2.63118	2.37056	2.70639	2.82788	2.43017	1.2317	2.64e-07
Q91VJ5_Pqbp1	1.26031	8.87196	0.739694	0.0673795	0.229545	7.19248	7.42633	0.151996	6.69298	9.76324	10.855	11.6089	15.0791	13.1521	12.5119	8.76975	15.1526	13.6122	9.22672	0.33711	7.84664	9.97565	8.50595	7.5975	11.232	0.789384	0.00240328
Q91VU0_Fam3c	1.03595	1.45337	0.768229	1.80172	1.18191	0.964052	0.703729	0.432629	2.44644	2.08773	2.34382	1.33082	2.61783	1.13524	2.65375	1.91466	1.14287	1.51321	0.987426	1.42536	1.28631	2.26505	0.970187	1.45283	2.21577	0.611901	0.00241711
Q921G8_Tubgcp2	0.88491	0.901549	1.00954	1.28483	0.990457	1.52533	1.59528	0.792336	1.98476	1.72286	2.09862	1.91761	2.0491	1.69306	2.30999	2.1911	1.37947	2.51618	1.27932	1.31658	1.0202	1.65207	1.90526	1.89816	2.01693	0.751521	0.000631399
Q922Q4_Pycr2	1.04319	0.89592	1.78315	0.956812	1.53131	0.357204	0.825192	1.09721	4.47584	5.28579	2.90837	2.91845	3.60791	3.82487	4.50355	5.42523	4.1034	3.00235	3.39224	3.31713	2.9072	2.45708	3.62669	2.91971	4.15036	0.761319	3.21e-07
Q924H9_Dqx1	2.11224	1.04992	0.489725	0.950082	0.753858	1.78587	1.0849	0.940169	3.56793	5.91149	4.27835	4.61588	5.66878	4.29511	4.91541	4.58386	5.77067	5.11667	4.39495	3.97371	3.53812	3.05636	2.35117	3.1018	4.59987	0.816526	5.92e-07
Q924L1_Letmd1	1.30145	0.559078	0.962764	0.833965	0.98229	1.22722	2.04254	1.01771	1.28963	1.08078	2.33919	0.896157	2.70795	4.59615	3.17956	3.07094	2.67461	0.908129	2.04375	1.27367	5.00241	4.69358	4.7681	3.69461	2.52357	1.26194	0.0186205
Q925E7_Ppp2r2d	0.815235	0.980817	0.840842	1.01918	1.21438	1.27454	0.944578	1.19191	0.864677	1.26796	1.06992	1.05854	1.46707	1.20309	1.45897	1.36722	1.49954	1.6824	1.51898	1.70018	1.36716	1.53548	1.48852	1.48515	1.23553	1.22155	0.000101032
Q99JG3_Anxa13	0.982184	0.784031	1.01782	0.510631	1.64167	1.11676	1.24525	0.654465	2.04816	2.262	2.38291	3.08622	1.98693	3.60177	3.46164	2.90842	2.12174	2.08533	1.88422	1.5051	2.5776	2.90334	1.29527	2.86443	2.64567	0.795086	3.42e-05
Q99KU6_	0.78226	0.939587	0.981837	1.01816	0.874319	1.14852	1.08318	1.10274	1.79545	1.03432	1.06149	1.25272	1.64696	1.65296	1.48525	1.2224	0.938182	1.12558	0.905431	1.07914	0.724107	0.745753	0.709883	1.29328	1.36899	0.673349	0.00168087
Q99KW3_Triobp	1.24086	1.61631	1.41759	0.888815	0.763439	0.675938	0.995268	1.00473	0.558906	2.5735	1.36983	2.22897	2.18668	2.24443	2.15503	2.17622	2.19894	1.59189	1.11228	1.16865	1.51229	0.847998	1.96127	2.22633	2.18145	0.711493	0.0182614
Q99LJ1_Fuca1	1.23109	1.71645	0.746742	0.898989	0.859504	1.10101	1.2783	0.836336	1.23819	1.07924	1.62884	1.30206	1.28398	1.11254	1.27496	1.42211	1.54852	1.5691	1.40951	1.53191	1.88326	1.56436	1.20837	1.31037	1.27947	1.20379	0.0141833
Q99P91_Gpnmb	0.0585122	0.0609692	2.27965	0.253775	0.0373489	3.09336	1.74623	15.4196	18.4143	31.2601	24.9398	26.6879	21.3605	21.3104	21.1512	23.8841	29.219	20.3451	29.6835	15.6648	37.3223	28.9178	24.5054	29.2131	22.6223	1.28481	1.6e-07
Q99PS0_Krt23	0.980845	1.29542	0.908819	0.936486	1.26758	0.938236	1.01915	1.47054	3.50544	1.56382	1.28991	1.28599	3.9913	0.953448	2.32055	1.13094	1.20497	0.953796	0.901127	1.20963	0.800049	0.863887	0.978369	0.818648	1.42687	0.649999	0.0205566
Q9CQ48_Nudcd2	1.53953	1.98665	0.782537	1.54594	0.667344	0.349279	0.638995	1.21746	1.00405	1.4164	1.90842	2.2135	2.28221	1.7007	1.61179	1.84128	3.79265	2.83249	2.64218	1.41378	1.7904	1.60835	2.37585	2.26676	1.77099	1.31074	0.00364584
Q9CQE5_Rgs10	0.913262	1.12359	1.83276	1.08674	1.50727	0.857829	0.543621	0.862556	4.6744	5.18123	6.99866	5.74196	6.00204	5.60265	8.34822	7.128	11.246	7.98374	7.58197	4.73588	7.19776	6.28406	6.8434	7.66945	5.872	1.25849	5.56e-08
Q9CQI3_Gmfb	1.27462	0.885423	1.3998	1.32348	0.942183	0.875287	1.05782	0.898722	1.40707	1.22671	2.13308	1.70284	1.63622	1.42693	1.80362	1.99513	2.87316	2.77672	2.13864	2.29289	2.03971	2.1588	1.89059	1.80272	1.66953	1.28702	5.92e-06
Q9CR39_Wdr45b	0.627832	1.03322	1.1479	1.25988	1.61494	0.966781	0.719958	0.546977	1.73265	1.20062	1.20886	0.988942	0.876797	1.22344	1.44915	1.44601	1.02737	0.881303	0.87689	0.796791	0.473385	0.576255	1.02082	0.930041	1.21615	0.722853	0.0272045
Q9CR60_Golt1b	0.624547	0.8138	1.72066	1.57008	1.35311	0.986836	1.01316	0.726014	2.81101	2.82021	1.88878	2.34073	2.43956	2.55218	2.37881	2.26853	1.97415	2.17047	1.56797	1.98135	1.79784	1.81157	1.69402	1.96627	2.40918	0.784051	8.06e-07
Q9CR64_Tmem167a	0.734525	0.725963	2.00998	0.934004	0.898004	1.066	1.47723	1.2181	4.58864	2.45719	1.85921	2.09714	1.13189	2.09096	1.39958	1.5381	1.17374	1.12982	0.871333	1.76933	2.40686	1.42545	1.0963	1.73777	1.97509	0.657994	0.0489698
Q9CRA4_Msmo1	0.656276	0.64215	1.07726	0.922737	1.56974	1.22836	0.760083	1.74084	2.91505	3.83487	1.70059	1.88037	3.12606	1.77138	2.54915	2.17284	1.92543	1.89988	1.44733	1.30917	1.67554	1.95002	1.31681	2.00187	2.36099	0.757186	0.000278646
Q9CSH3_Dis3	1.24876	0.57012	0.99858	0.891525	0.895434	1.0136	1.00142	1.19936	2.75818	3.03767	2.44864	1.86325	1.50887	3.00447	2.39472	2.76056	2.40182	1.16271	1.02998	2.05545	1.7654	0.767329	1.67265	2.17839	2.60341	0.660298	5.11e-05
Q9CYZ6_Rex1bd	0.973621	0.978145	1.16612	0.489938	1.32237	1.02186	0.914675	1.52268	0.936279	1.09887	1.31724	1.11145	1.38332	1.29646	1.15728	1.63518	1.66686	1.52806	1.34422	1.87427	1.56295	1.05721	1.36004	1.81513	1.22687	1.25971	0.0108633
Q9D154_Serpinb1a	1.16502	2.13423	0.795941	0.913586	0.668638	0.588643	1.08641	1.98495	2.1666	2.30714	3.48161	3.23983	2.08534	2.55251	2.9622	4.2511	5.74829	3.64187	2.93865	2.70473	3.63548	3.48901	2.02338	3.5965	2.75735	1.28484	0.000140146
Q9D2V8_Mfsd10	0.977337	0.331095	0.461172	0.647546	1.02266	1.15146	1.72041	1.4796	5.26584	5.32666	3.21598	4.86277	4.7148	3.24858	5.60346	3.60532	4.22393	5.18069	3.31081	3.0287	3.1308	3.9333	2.9599	3.55763	4.78878	0.717138	1.82e-07
Q9D4F8_Tubgcp4	1.14915	0.908347	1.09165	0.695708	1.17024	0.317138	0.791517	1.1677	0.976623	1.50207	1.40742	1.3756	1.27551	1.43229	1.67308	1.31243	0.966234	1.30106	0.878996	1.40089	1.32575	0.966956	0.924497	1.27202	1.39151	0.804511	0.00779261
Q9D7H3_RtcA	1.69712	0.271318	1.12289	1.35426	0.472831	0.771796	0.934963	1.06504	2.55517	1.27382	2.14489	1.35062	1.19071	1.57451	1.50511	1.56277	2.30046	1.83121	2.10444	1.84581	1.27333	2.09222	1.53331	1.96754	1.53394	1.24299	0.00198304
Q9D7I5_Lhpp	0.675703	0.867456	1.18046	1.00151	1.04313	0.998487	0.822373	1.63937	0.756871	1.35577	1.40905	1.65715	1.11556	0.926909	1.03005	1.30415	1.76291	1.56208	1.78815	1.53172	2.05951	1.45908	1.12318	1.41582	1.20985	1.27859	0.00506724
Q9D809_2200002D01Rik	1.98036	1.01993	1.36879	0.48022	0.78232	0.980068	0.491667	1.64101	4.43441	5.82693	6.40205	4.45125	3.08293	6.42115	6.54595	4.5031	6.74065	8.02298	7.1428	6.69506	6.91693	6.73475	5.22805	4.57065	5.16502	1.30449	2.1e-08
Q9D882_Fam241b	0.976526	1.73434	0.902492	1.46825	1.02347	0.865591	1.09899	0.67793	3.27094	3.55528	2.80632	2.79854	3.85707	3.39166	3.5995	3.10111	2.90178	2.3876	2.39053	2.1347	2.65314	2.64729	2.71491	2.62322	3.3313	0.791059	1.03e-09
Q9D883_U2af1	0.754806	1.22863	0.970301	1.0297	0.967291	1.08746	0.86778	1.09346	1.35368	1.27869	1.25296	1.18999	1.26985	1.03158	1.2294	0.912822	0.847279	0.993561	1.02072	0.940703	0.982596	0.996275	1.05243	1.14635	1.24118	0.801592	0.0159772
Q9DB42_Znf593	1.35194	0.836942	0.97776	0.9755	1.23113	0.529405	1.02224	1.34769	1.63487	1.53799	1.47297	1.17473	1.87405	1.9999	1.83816	1.55616	1.15819	1.58102	1.22886	1.39868	1.4467	1.64023	0.716472	1.07102	1.59552	0.823415	0.00268005
Q9DBY8_Nvl	1.10982	0.888548	1.14216	0.89018	1.2122	0.408559	1.11538	0.651034	1.68516	1.48849	1.20151	0.909752	0.90379	1.44139	1.74692	1.38254	0.906836	0.908391	1.0126	1.04529	0.941212	0.690978	1.14737	1.42265	1.41197	0.691877	0.0232349
Q9DBZ1_Ikbip	4.57076	1.09559	0.683359	1.00839	0.991612	0.234733	2.14463	0.386283	6.26444	5.79523	3.94593	5.1092	4.83489	4.63295	4.21926	5.83924	2.35301	2.01603	2.7161	4.20237	4.42639	6.12778	3.68212	5.72739	4.97204	0.792881	0.000112771
Q9DCV7_Krt7	1.4471	2.14649	1.16994	0.598431	0.830057	0.28153	1.43069	0.538811	3.80347	3.08817	2.26211	4.3149	1.6313	2.06933	3.20826	5.40308	2.50721	2.99874	2.18695	1.5841	2.66504	1.9573	1.65897	1.65595	3.14821	0.65819	0.000619663
Q9EPL4_Mettl9	1.10297	1.73078	1.7252	0.698641	1.97675	0.897027	0.738189	0.711593	1.94649	1.99232	1.03889	1.48884	1.93898	1.90939	1.78561	1.84075	1.31104	1.48797	1.03323	1.48995	1.67407	1.16407	1.32408	1.51354	1.87507	0.749851	0.040846
Q9EQR4_Clca3a2	0.990411	1.24455	0.868939	1.00959	0.822328	0.420861	1.10013	1.9143	1.63771	3.37035	2.51318	2.192	1.19792	0.682769	2.24646	2.28581	2.54516	1.42772	0.837242	0.711626	1.43792	0.866101	1.60911	2.20857	2.21923	0.645637	0.0401259
Q9ERG2_Strn3	0.742953	1.26082	0.820356	1.17964	1.57724	1.34385	0.721708	0.156205	1.05914	2.52834	1.7678	1.87677	1.09215	1.34629	1.69688	2.16698	1.6346	0.497985	1.42374	0.941598	1.80239	1.62038	0.472138	1.12436	1.73234	0.73545	0.0384161
Q9ESN6_Trim2	1.09021	0.989067	0.619659	1.01093	0.969006	1.20556	0.758618	1.16114	1.68731	1.32111	1.51223	1.92348	1.96715	1.30642	1.95576	1.90304	1.50523	1.20714	1.72712	1.06831	1.47747	1.61543	1.29077	1.26884	1.79518	0.771021	7.04e-05
Q9JI11_Stk4	1.33906	1.49144	0.651054	0.937457	0.554977	0.323453	1.18971	1.06254	2.25566	2.53113	3.13645	2.86309	3.57909	2.91617	3.42143	4.22724	3.41101	3.76204	1.46353	1.84979	2.05835	1.54385	1.18164	3.10552	3.02631	0.645694	6.42e-05
Q9JIH2_Nup50	1.08572	1.47987	0.826032	0.818508	0.649386	1.22859	1.21792	0.914283	1.26588	1.33789	1.85547	1.25295	1.65137	1.10301	1.85899	1.25007	1.08019	1.21177	1.77146	0.978638	0.973272	0.836722	0.941802	0.976101	1.30188	0.750736	0.0288027
Q9JIS8_Slc12a4	1.14446	0.79357	1.36416	1.06592	1.10386	0.685468	0.934082	0.795813	1.70301	1.54564	1.46777	1.34817	1.62877	1.82926	1.85219	1.13825	1.82127	1.26463	1.01653	1.18123	0.999384	0.848737	1.17685	0.9726	1.58721	0.690954	0.00144422
Q9JK53_Prelp	0.838605	1.19273	0.786805	1.03223	1.43879	1.45657	0.905773	0.967768	6.34548	4.74781	3.67521	4.81345	3.71888	4.92023	3.94979	4.76677	3.43189	3.27224	3.33553	2.78954	4.68053	4.28076	3.12605	4.13623	4.75729	0.711268	1.63e-08
Q9JKD3_Scamp5	1.26296	0.961668	1.16416	0.995941	0.456781	1.00406	1.20268	0.459817	4.89122	4.42292	3.9754	2.96849	5.14232	4.35572	2.80977	3.86615	2.37462	1.75089	3.92656	2.4337	3.6614	2.13913	2.85698	4.16377	4.16556	0.635049	7.93e-07
Q9JKW0_Arl6ip1	0.844387	0.464902	1.06603	2.65127	0.933969	0.780922	2.27045	2.40562	3.00454	3.36237	3.50696	2.44809	3.07783	3.73547	2.3067	1.0364	2.47486	2.69553	1.56601	2.65146	2.34043	2.82803	1.52886	1.10766	3.04118	0.79168	0.0150435
Q9JLJ5_Elovl1	0.861529	1.26677	0.957052	1.42091	1.04295	0.686028	1.08772	0.804567	3.12022	2.82743	2.38461	2.93602	3.29007	3.27395	3.12645	3.09137	2.68722	2.23804	2.15572	2.4255	2.30627	2.47699	3.01666	2.82412	3.10579	0.789249	4.13e-10
Q9QXK7_Cpsf3	0.98056	0.614521	1.38679	0.448718	0.952352	1.85057	1.66463	1.01944	1.58765	1.75305	1.66307	1.59877	1.85445	1.67582	1.05814	1.60633	0.883129	0.946733	1.07023	1.28393	1.31699	1.36273	1.32879	1.59402	1.6347	0.795534	0.0377139
Q9QY06_Myo9b	0.880885	1.01036	0.708366	1.05531	1.1269	1.0251	0.989642	0.731657	3.21323	2.78381	2.38877	3.04092	2.98661	2.39274	3.29195	2.41466	2.66554	2.45048	1.9191	2.15233	2.24668	2.39645	2.18122	2.37298	2.88521	0.800576	5.53e-10
Q9QY24_Zbp1	0.79746	0.711604	3.49232	1.20254	1.74996	0.398983	1.32616	0.423927	2.00305	2.19099	2.76508	1.51804	1.66553	1.23569	1.27828	2.00457	3.24972	2.67701	2.69798	1.86341	1.47685	2.12738	2.26133	2.18247	1.83429	1.21131	0.0441658
Q9R0C0_Bloc1s6	0.651482	0.165866	0.571609	1.3119	1.40323	1.67582	2.6315	0.688104	2.70962	2.34381	2.39741	2.11154	1.62265	1.92136	1.09013	2.92872	2.74201	3.44828	2.10924	3.93188	3.58028	3.30915	2.78328	3.52156	2.22768	1.5167	6.35e-05
Q9R1J0_Nsdhl	0.702572	0.829907	0.826823	1.17009	1.28166	1.43472	0.792901	1.29551	3.14359	3.4322	1.9113	2.30222	3.02477	1.91835	2.68393	2.64042	2.02714	2.19956	1.77373	1.85713	2.23096	2.26846	1.94234	2.43793	2.66217	0.793843	1.16e-06
Q9WTQ5_Akap12	1.09998	0.900021	0.864555	0.845665	1.56937	1.18823	1.61622	0.614825	2.35497	2.15501	1.95106	2.41817	1.7486	2.07463	2.19924	2.86544	3.42571	2.73721	2.70006	2.75863	2.95568	2.663	2.25872	2.54953	2.17712	1.24873	1.1e-07
Q9WTX8_Mad1l1	1.04702	0.461481	3.13314	1.74071	0.410616	0.851114	1.11408	0.952981	1.86427	0.756293	2.37011	1.33113	4.14963	1.37778	1.08378	1.55295	0.519869	0.328375	0.324421	0.935342	0.504802	0.904449	0.128966	1.36273	1.46536	0.34963	0.0479286
Q9WTZ0_Uxt	1.23157	0.71952	0.800838	0.527012	1.79515	0.893491	1.10651	1.52126	10.8218	17.6235	1.31087	1.70267	1.29512	0.261987	1.42473	11.8585	0.953249	0.891536	1.35834	0.280787	0.61685	1.12877	0.869511	0.843501	1.5637	0.563103	0.0444853
Q9Z0E6_Gbp2	0.969723	1.03028	1.1792	1.26416	1.26887	0.744416	0.768884	0.848774	1.92881	1.69309	4.26858	2.33405	1.81837	1.78603	2.1159	2.51561	3.43229	3.99294	2.65682	2.16402	2.58426	2.28998	1.8356	1.85821	2.02235	1.20509	0.000541829
Q9Z0M6_Adgre5	1.10467	0.895334	1.10844	0.535507	1.36698	0.84224	1.13826	0.826506	2.6224	2.99152	2.04209	2.00386	1.93425	2.16184	2.74826	2.45996	2.10104	1.69808	1.73023	1.33257	1.86326	1.69449	1.14561	2.05382	2.3109	0.741769	1.07e-06
Q9Z0W3_Nup160	0.893693	0.964929	1.01242	0.987577	1.11128	0.961864	1.34923	1.07521	1.77965	1.47997	1.33454	1.47903	1.79008	1.5079	1.48399	1.37382	1.11817	1.18517	1.1873	1.27461	1.20646	1.1873	1.29378	1.27491	1.48198	0.807622	5.71e-06
Q9Z2D6_Mecp2	1.02591	1.22299	0.947062	0.95557	0.974088	1.19004	1.12586	0.787762	1.64314	1.4044	1.41606	1.06777	1.23605	1.20634	1.41078	1.11445	0.90202	1.05614	0.982796	1.02564	1.20823	0.968467	1.0657	1.19362	1.32023	0.788417	0.00344519
A2AIL4_Ndufaf6	1.10411	1.05104	0.777368	0.948964	1.06619	1.08378	0.561545	0.51576	0.62593	0.62591	0.702391	0.599472	0.209108	0.554652	0.556574	0.443819	0.446332	0.600203	0.795623	0.676132	0.722758	0.782099	0.830101	0.558491	0.578023	1.21006	0.00637975
A2AKY4_Znf804a	0.985141	0.978545	1.03692	1.18001	1.19332	0.955173	1.01486	0.893586	0.671949	0.803906	0.712801	0.592767	0.791952	0.642929	0.586817	0.446662	0.447297	0.581667	0.52598	0.509665	0.426771	0.522214	0.692523	0.433496	0.657439	0.784771	8.29e-08
A2ALW5_Dnajc25	0.765274	0.95399	1.41987	1.04601	1.29536	1.19394	0.897192	0.815525	0.535962	0.421246	0.34893	0.441416	0.658593	0.473226	0.403665	0.352496	0.377161	0.251288	0.242856	0.47784	0.345373	0.260269	0.344722	0.451416	0.431331	0.79996	1.62e-07
A7MCT6_Etnk2	0.998483	1.03507	1.04956	1.00152	0.801459	0.89784	0.927509	1.33864	0.527328	0.689305	0.637112	0.649768	0.856579	0.652758	0.608112	0.691162	0.871343	0.882247	0.930859	0.896315	0.815185	0.760187	0.749918	0.665581	0.651263	1.29481	0.000122492
E9PWV0_Cyp2t4	0.962127	0.79463	0.69107	1.03787	1.04586	0.758752	1.05254	1.09452	0.317029	0.342096	0.364929	0.370462	0.281837	0.297945	0.279829	0.282361	0.25241	0.35988	0.417174	0.390929	0.528176	0.345543	0.380063	0.279999	0.307487	1.20321	2.38e-09
E9Q3H6_Coq10a	1.37904	1.34347	0.196956	0.775459	0.880035	1.11188	1.33007	0.888121	0.320614	0.244592	0.277564	0.624313	0.266624	0.409149	0.297067	0.574696	0.12709	0.749423	0.304828	0.520702	0.421121	0.495538	0.490769	0.426176	0.30884	1.4845	0.000568237
O35083_Agpat1	1.94117	0.815973	0.917071	1.08293	1.22966	0.858006	1.24517	0.699164	0.934848	0.086518	1.04465	0.346604	0.178155	0.467809	0.048118	0.0295138	0.365762	0.137498	0.208067	0.895235	1.13507	0.420814	0.599584	0.158999	0.262379	1.49893	0.00521888
O35215_Ddt	1.0387	0.993254	1.06366	0.845264	0.876264	0.871386	1.00675	1.25972	0.379635	0.476882	0.543343	0.626456	0.532423	0.637663	0.488776	0.660695	0.647244	0.7012	0.742137	0.735503	0.61299	0.713049	0.575638	0.479651	0.537883	1.25347	8.05e-07
O35566_Cd151	0.460116	0.527843	0.911057	1.13379	1.50595	0.900288	1.3442	1.08894	1.6172	1.62748	0.628762	1.24923	0.780069	0.720039	0.484532	0.531208	0.933117	1.2742	1.70385	1.45978	2.29118	1.03965	1.69222	1.68402	0.750054	2.09572	0.0416925
O35728_Cyp4a14	1.64399	1.00116	0.306443	0.226858	0.998837	0.583793	2.03955	3.0126	0.15326	0.0932738	0.1531	0.206448	0.070033	0.0512206	0.0536594	0.0969518	0.0848858	0.0752414	0.261159	0.10126	0.24518	0.211435	0.123468	0.137552	0.0951128	1.37216	0.00155908
O35988_Sdc4	1.16413	0.768426	1.01718	0.894657	1.08417	1.15742	0.982823	0.62278	0.761844	0.866301	0.726217	0.495935	0.378046	0.673423	0.63665	0.539738	0.541984	0.359305	0.502864	0.547248	0.434228	0.501179	0.552724	0.665126	0.655037	0.797549	7.07e-05
O55042_Snca	0.764389	0.775444	0.954964	1.0769	1.22002	1.00676	0.993236	1.618	0.399509	1.0295	0.568119	0.805532	1.56345	1.0117	0.615605	0.619854	2.3923	1.34846	1.16264	1.53304	1.16495	0.834288	1.25378	1.49739	0.712693	1.82564	0.0313424
O55126_Nipsnap2	1.38917	0.999335	0.736682	0.542379	1.34083	0.860988	1.00067	1.12612	0.745198	0.544867	0.693336	0.675433	0.508191	0.830513	0.445332	0.55501	0.504754	0.478706	0.907943	0.761289	0.840347	0.903949	0.93146	0.448238	0.615222	1.30167	0.0125317
O55239_Nnmt	0.559246	0.50506	2.77732	0.978309	1.76062	1.02169	1.09194	0.94009	0.278207	0.341618	0.374277	0.277159	0.528652	0.636648	0.243581	0.323171	0.390502	0.615601	0.430719	0.487573	0.373075	0.47847	0.490172	0.429019	0.332395	1.36763	0.00355556
O70480_Vamp4	1.29816	1.12754	1.02839	0.971614	0.368447	0.965539	1.07016	0.448087	0.340939	0.182593	0.429366	0.425854	0.459821	0.151101	0.146433	0.172549	0.513868	0.147006	0.240292	0.782321	0.787192	0.418492	0.19321	0.225986	0.261766	1.25834	0.000453706
O88712_Ctbp1	0.939654	1.29344	1.06035	1.23871	0.911402	1.31205	0.821683	0.87959	0.495499	0.61544	0.457666	0.699429	0.500149	0.600546	0.532954	0.765324	0.87952	0.789018	0.749229	0.655201	0.81268	0.818465	0.85485	0.551132	0.56675	1.41306	2.72e-05
O88833_Cyp4a10	1.25256	0.909464	0.400528	0.905491	0.828742	1.09054	1.95753	1.79339	0.371428	0.301397	0.29003	0.246716	0.1267	0.227631	0.226962	0.191156	0.2383	0.261385	0.422391	0.341507	0.370302	0.317237	0.266512	0.268154	0.237173	1.2341	2.76e-05
O88947_F10	1.93523	2.03865	0.887905	0.911088	1.08891	0.79556	1.16887	0.408775	0.864082	0.594847	0.584874	0.48064	0.604471	0.639308	0.535238	0.699524	0.749347	0.699159	0.93059	0.603012	0.866309	0.872395	0.87418	0.813156	0.599659	1.40035	0.0249339
O89112_Lancl1	1.02252	1.08485	0.999051	1.15459	0.688652	1.00095	0.837399	0.857152	0.604105	0.6646	0.902381	0.709099	0.696717	0.707008	0.664808	0.45458	0.895902	0.920851	0.833865	0.685073	0.580171	0.807421	0.850884	0.632518	0.680763	1.20548	0.0031584
P03958_Ada	1.06755	1.60339	0.850444	0.928975	1.31313	0.932453	1.2138	0.718708	0.681656	0.11668	0.461865	0.301103	0.635536	0.390901	0.422326	0.477489	1.14993	0.708601	0.597977	0.296274	0.392626	0.754134	0.646555	0.518236	0.442095	1.40754	0.000313204
P04919_Slc4a1	0.99326	1.83723	1.00674	0.907723	1.24427	0.905971	0.633938	1.82107	0.651445	1.01984	0.696535	0.642477	1.13027	0.662345	0.504594	0.471397	1.13766	0.822097	1.20603	1.07167	1.02698	0.85406	1.27675	0.78904	0.656895	1.5974	0.0384966
P05201_Got1	0.968004	0.916387	1.76066	0.754461	0.807039	1.032	1.12083	1.34483	0.501374	0.690231	0.789639	0.710307	0.735691	0.827534	0.553674	0.877202	0.849802	0.92998	1.15216	0.95849	0.983064	1.06404	0.921516	0.700031	0.722999	1.306	0.0140866
P05555_Itgam	1.25658	1.34043	0.60299	1.20079	1.07149	0.928511	0.0554495	0.440517	0.47617	0.13361	0.402382	0.263461	0.330565	0.432939	0.276922	0.345323	0.554211	0.255841	0.171895	0.29241	0.190099	0.546912	0.509181	0.124472	0.337944	0.811156	0.00300561
P08103_Hck	1.25337	0.911289	1.19498	1.08871	0.802785	0.760557	0.189657	1.24731	0.236405	0.508485	0.321211	0.187206	0.429009	0.220577	0.420645	0.272291	0.396722	0.502772	0.373438	0.282129	0.409098	0.406236	0.313588	0.332728	0.296751	1.29765	7.14e-05
P10518_Alad	1.0487	1.03731	0.859278	0.953713	0.973244	0.902276	1.02676	1.22975	0.564713	0.570955	0.838857	0.856837	0.624656	0.675278	0.632097	0.807541	0.846426	0.743556	0.786439	0.830087	0.889629	0.841499	0.764354	0.65085	0.653687	1.23647	8.5e-05
P12790_Cyp2b9	1.65446	0.987869	0.18445	0.912096	0.445701	1.01213	1.39127	1.06833	0.627893	0.431703	0.397857	1.23943	0.768923	1.10877	0.822947	0.721859	1.44128	1.43094	1.53542	1.83156	1.01017	1.2982	2.31653	1.17132	0.745391	1.92666	0.00669817
P19258_Mpv17	1.04686	0.84222	0.977604	1.0224	0.776538	1.11405	1.35118	0.83106	0.507731	0.342674	0.238165	0.264609	0.326409	0.151677	0.30627	0.179408	0.300963	0.330506	0.465977	0.48912	0.397143	0.477386	0.507006	0.401129	0.28544	1.5189	1.63e-08
P26149_Hsd3b2	0.78276	1.13989	0.732955	1.02616	0.766386	1.03572	1.38817	0.973843	0.442775	0.22057	0.39124	0.152477	0.240202	0.419915	0.191686	0.173942	0.0749469	0.13218	0.1383	0.198037	0.108132	0.196505	0.248191	0.172251	0.230386	0.67398	7.22e-09
P31532_Saa4	0.79644	0.978425	1.9789	1.92263	2.97303	1.02158	0.785446	0.607715	0.45797	0.470835	0.466924	0.144322	0.432869	0.336162	0.362189	0.396846	0.340258	0.544035	0.275804	0.28736	0.317246	0.297738	0.212291	0.291097	0.414857	0.709684	0.00074445
P32507_Nectin2	0.814607	1.03223	1.09249	1.43789	1.23085	0.842571	0.967767	0.491843	0.703273	0.60685	0.54647	0.352746	0.510851	0.560237	0.465894	0.213836	0.31803	0.319052	0.51753	0.376143	0.343693	0.420991	0.360579	0.455076	0.528661	0.696781	2.31e-05
P35492_Hal	1.01278	0.897954	1.00422	0.710867	0.830914	0.995775	1.03769	1.23779	0.249516	0.309207	0.379909	0.364527	0.317819	0.474874	0.219267	0.34488	0.203082	0.426853	0.528447	0.540386	0.514618	0.511375	0.475983	0.336935	0.331349	1.48991	2.16e-08
P43006_Slc1a2	0.793037	0.889199	0.87314	1.06652	1.30642	1.12595	1.32621	0.933478	0.367564	0.357923	0.685977	0.442609	0.48077	0.471012	0.509579	0.377599	0.520802	0.538751	0.616397	0.430707	0.779536	0.557983	0.613603	0.510319	0.45681	1.20043	9.94e-07
P48760_Fpgs	0.692721	0.761002	1.32459	0.96441	1.27498	1.12686	1.03559	0.844546	0.493164	0.350084	0.345824	0.215231	0.405006	0.342383	0.357197	0.406114	0.0506617	0.21707	0.282606	0.168566	0.276746	0.318793	0.176081	0.285685	0.353641	0.698188	2.2e-08
P48776_Tdo2	1.11007	1.10304	0.757064	0.840086	0.648334	1.14234	0.97387	1.02613	0.526322	0.379952	0.587199	0.610168	0.836614	0.702898	0.618563	0.581888	0.718077	0.819015	0.786963	0.727472	0.745216	0.7327	0.830526	0.639574	0.598684	1.2343	0.000479277
P49222_Epb42	0.971334	2.09934	1.02867	0.662635	1.40847	0.777533	0.637358	1.62526	0.576008	0.847009	0.280043	0.597437	0.937916	0.614358	0.377561	0.449757	1.15739	0.834867	1.52318	1.05026	1.20595	0.892172	1.17774	0.721167	0.586722	1.88134	0.0157813
P52432_Polr1c	0.88702	1.07466	0.988047	1.0776	1.14605	0.880702	1.01195	0.869553	1.00843	0.468063	0.688157	0.432403	0.645414	0.66858	0.529484	0.156484	0.612366	0.514467	0.447171	0.231248	0.27358	0.555025	0.901428	0.19506	0.587449	0.818486	0.000283571
P52840_Sult1a1	0.868428	0.965281	1.29773	0.670786	0.956634	1.03472	1.18061	1.33355	0.587202	0.775729	0.669002	0.823538	0.682567	0.675485	0.596662	0.848254	0.918916	0.739387	0.919155	0.750582	1.0078	1.0351	0.750859	0.751383	0.679026	1.22992	0.00341784
P56376_Acyp1	1.10402	1.40364	0.882741	1.07026	0.929739	0.819913	0.911521	1.31184	0.654812	0.74056	0.864971	0.847439	0.835052	0.774081	0.806194	0.992537	1.57294	1.31382	0.926975	1.11064	0.967845	0.901477	0.942963	1.00265	0.820623	1.20061	0.0273094
P56382_Atp5f1e	1.14959	0.945735	1.11752	0.862102	0.970153	1.02985	1.06292	0.522372	0.190173	0.571462	0.177518	0.212146	0.133325	0.0925152	0.305937	0.390256	0.151918	0.244125	0.590066	0.665396	0.528662	0.587056	0.517512	0.254286	0.20116	2.60035	2.95e-06
P56393_Cox7b	0.977316	0.931574	0.817011	1.06976	0.78212	1.02268	1.13816	1.08179	0.829066	0.646324	0.436751	0.684173	0.211158	0.480084	0.386474	0.476282	0.518426	0.571258	0.767454	0.670109	0.76747	0.719957	0.345833	0.430304	0.478183	1.298	7.83e-05
P56654_Cyp2c37	1.22798	1.17309	0.359992	0.726572	0.744733	0.863068	1.13693	1.29541	0.162056	0.215629	0.207518	0.219383	0.139327	0.145833	0.142914	0.160325	0.128635	0.222809	0.296048	0.205112	0.330733	0.211585	0.168641	0.156121	0.161191	1.29256	4.39e-07
P59913_Pcmtd1	1.02559	0.974409	0.855727	0.922404	0.902346	1.19579	1.07571	1.28699	0.402508	0.151563	0.223794	0.218507	0.273638	0.291564	0.391266	0.244236	0.342308	0.348487	0.45452	0.436392	0.31202	0.419688	0.42979	0.335345	0.258937	1.48332	1.82e-10
P62342_Selenot	0.686718	0.756731	1.06829	0.931711	1.13778	1.07776	1.14659	0.913519	0.441901	0.303486	0.309789	0.248806	0.167502	0.265757	0.169745	0.275663	0.228865	0.288583	0.385341	0.432356	0.329232	0.445868	0.449808	0.294974	0.27071	1.31981	4.35e-09
P62915_Gtf2b	0.767127	0.889897	1.25987	1.02346	1.20487	1.02656	0.976538	0.394834	0.247055	0.287864	0.42003	0.152794	0.355061	0.368442	0.478982	0.304826	0.300983	0.0899102	0.281959	0.370029	0.152054	0.253977	0.232631	0.256287	0.329944	0.773261	6.76e-07
P68134_Acta1	0.878984	1.19274	1.37399	0.719534	1.12102	1.36996	0.81689	0.871988	0.120392	1.06567	0.73516	0.126586	0.71652	0.0886804	0.0617539	0.660264	0.051799	0.110169	0.14679	0.181485	1.10877	0.0530898	0.027298	0.122063	0.393425	0.295141	0.000684307
P70195_Psmb7	1.09486	1.1058	0.960583	1.00781	1.02105	0.875252	0.919445	0.992193	0.613807	0.529117	0.722527	0.807087	0.613071	0.636182	0.640836	0.747749	0.785207	0.768715	0.794996	0.768101	0.755707	0.83911	0.724674	0.69181	0.638509	1.20344	2.95e-07
P70389_Igfals	0.826727	1.00494	0.882685	1.17502	0.995059	1.1005	1.02577	0.869774	0.496738	0.412295	0.39181	0.525675	0.339297	0.412406	0.317293	0.579049	0.513421	0.777713	0.61839	0.785857	0.555759	0.582107	0.708964	0.509182	0.412351	1.45567	6.66e-08
P70444_Bid	1.03036	1.00756	1.17682	0.903475	0.846344	0.992445	0.728877	1.32105	0.542048	0.457289	0.703043	0.599513	0.53104	0.684795	0.593618	0.692088	0.802192	0.743662	0.837455	0.920006	0.692024	0.836852	0.580548	0.654413	0.596565	1.29563	9.2e-05
P70665_Siae	1.03837	1.16292	0.822072	0.961626	0.802869	0.889258	1.13209	1.11066	0.754987	0.71251	0.796767	0.754094	0.940351	0.786559	0.757045	0.832848	0.90249	0.884586	0.967109	1.00874	0.969236	0.993135	0.98802	0.958841	0.771802	1.25443	0.00178115
P70671_Irf3	1.09089	0.90295	0.990856	1.14322	0.847267	1.10491	1.00914	0.800763	0.368827	0.373004	0.414554	0.512583	0.345622	0.401546	0.363357	0.485809	0.638482	0.559371	0.55194	0.503181	0.430075	0.476988	0.514216	0.375255	0.387275	1.31353	1.65e-09
P98195_Atp9b	1.3236	1.03556	0.918839	0.964439	1.0378	1.10989	0.618104	0.744589	0.606623	0.644749	0.874393	0.472983	0.648141	0.218958	0.493636	0.443058	0.567975	0.639125	0.658729	0.656596	0.664788	0.668705	0.704416	0.746659	0.550129	1.20291	0.000523895
P99025_Gchfr	1.01607	1.39961	1.40499	0.673513	0.983927	0.925451	0.844666	1.66888	0.271156	0.580364	0.69902	0.507447	0.526549	0.240493	0.224974	0.394367	0.627588	0.566561	0.676148	0.596263	0.616326	0.425884	0.44517	0.425609	0.450907	1.28943	3.75e-05
Q00262_Stx2	1.02088	0.979117	0.940646	1.58667	0.890266	1.39955	1.45465	0.6978	0.722425	0.580634	0.531666	0.8491	0.268166	0.461208	0.495124	0.343545	0.426031	0.223555	0.35006	0.401173	0.805205	0.692831	0.291326	0.365471	0.513395	0.746641	7.38e-05
Q01237_Hmgcr	0.899465	12.3602	1.10053	0.401608	0.307369	7.86781	7.70895	0.0988947	0.25059	0.272227	0.826872	0.277874	0.240006	0.454646	1.04151	0.31028	0.33562	0.378501	0.132612	0.218141	0.157983	1.20751	0.128622	0.0729776	0.294077	0.639499	0.0449187
Q05020_Apoc2	0.84566	1.81715	0.861478	1.46156	1.08352	0.941123	1.05888	0.842773	0.462783	0.597674	0.602344	0.829469	0.388026	0.549612	1.1452	0.477314	1.12811	1.21371	0.651833	0.258639	1.04694	0.789557	0.945206	0.177012	0.573643	1.51206	0.0386671
Q3TH73_Ttyh2	0.654386	0.629721	0.83441	0.94113	1.15716	1.29171	1.32465	1.05887	0.272299	0.131903	0.213985	0.162063	0.147439	0.17945	0.27024	0.187996	0.299076	0.28308	0.287057	0.266375	0.220685	0.293958	0.296275	0.212325	0.183723	1.55162	2.56e-08
Q3TJ91_Llgl2	1.02293	0.97707	1.14464	0.890826	0.844032	0.941564	1.19165	1.03456	0.353556	0.435193	0.515215	0.621166	0.478487	0.604603	0.640843	0.486171	0.434619	0.640541	0.674995	0.628571	0.587629	0.508923	0.676167	0.592232	0.500693	1.21911	6.25e-08
Q3TMH2_Scrn3	0.948872	1.01433	0.920791	0.98567	1.01553	0.944982	1.04035	1.07501	0.255911	0.190741	0.326479	0.317253	0.238942	0.336736	0.309646	0.306691	0.374484	0.330893	0.371926	0.405995	0.309859	0.402821	0.391925	0.243589	0.308169	1.21104	2.21e-14
Q3TPX4_Exoc5	1.51893	0.957059	1.04294	0.904909	0.941969	1.50399	0.895635	1.75096	0.556283	0.699571	0.439456	0.369287	0.39896	0.501565	0.408828	0.418527	0.465212	0.450598	0.58974	0.594489	0.55868	0.549075	0.547157	0.645913	0.428992	1.29111	6.04e-06
Q3UHH8_Gxylt1	0.709041	0.619577	1.09016	1.12348	1.01072	0.989278	1.28264	0.600774	0.484132	0.449727	0.540213	0.395653	0.518782	0.578595	0.481843	0.521386	0.393304	0.327629	0.342746	0.471603	0.487766	0.38241	0.656244	0.408801	0.501457	0.799775	2.51e-05
Q3UVG3_Fam91a1	1.00695	0.678044	1.07791	0.993048	1.01635	0.815757	1.46379	0.693768	0.595889	0.561372	0.591107	0.642553	0.531273	0.696066	0.731767	1.10825	0.694833	0.926422	0.879258	0.713591	0.942551	0.608301	0.841299	1.08686	0.619221	1.38929	0.0491995
Q4KWH5_Plch1	0.833571	1.14757	1.38996	1.43882	1.41148	0.807891	0.852434	0.773045	0.728651	0.913178	0.764884	0.812407	0.820673	0.802632	0.680039	0.753041	0.549096	0.65664	0.64746	1.0513	0.627941	0.854908	0.919291	0.593563	0.783758	0.831953	0.0102856
Q505D1_Ankrd28	1.2767	1.22677	1.28888	1.0053	0.994705	0.860189	0.591989	0.749317	0.256397	0.648149	0.89355	0.537805	0.875743	0.741839	0.520523	0.707415	1.20439	1.04873	0.869126	0.838076	0.760828	0.762366	0.765913	1.06174	0.677782	1.2594	0.0161272
Q571E4_Galns	0.982741	1.05123	0.753009	0.829814	0.897685	1.01726	1.01984	1.10168	0.678749	0.88856	0.855105	0.78765	0.912604	0.790375	0.59527	0.798956	0.832775	0.992276	1.0288	0.936392	1.06562	0.903673	1.03879	0.910139	0.794665	1.21351	0.00681372
Q571F8_Gls2	0.962817	1.04061	1.04995	0.656689	0.777748	1.01603	0.983972	1.03117	0.515655	0.584444	0.527899	0.455177	0.4612	0.58441	0.356064	0.425395	0.29401	0.488833	0.700462	0.667563	0.639013	0.593775	0.693039	0.443515	0.488428	1.262	4.11e-06
Q5NBU8_Xaf1	1.02399	1.06495	1.11469	0.702152	0.590828	0.976005	0.827967	1.25328	0.16261	0.360709	0.30093	0.0466864	0.290347	0.0323409	0.0637593	0.000111353	0.322812	0.605299	0.798476	0.219251	0.352054	0.43409	0.329922	0.227497	0.113185	3.01267	1.08e-06
Q5NCF2_Trappc1	0.945084	0.929412	1.75746	1.40577	1.05492	0.905059	1.09488	0.659805	0.85551	0.542075	0.314417	0.806739	0.440577	0.762764	0.469491	0.760683	1.44452	1.13916	1.15257	0.814303	1.3471	1.13683	0.793682	0.965527	0.651379	1.74705	0.00356238
Q5U405_Tmprss13	1.30589	1.03824	1.89907	0.961763	1.06352	0.626448	0.839338	0.875582	0.630377	0.224743	0.57123	0.899108	0.24093	0.270061	1.16329	0.514531	1.1904	0.646355	0.3005	1.42706	1.10982	1.046	0.926822	0.899508	0.542881	1.817	0.0373895
Q60991_Cyp7b1	0.797023	0.759697	0.674058	2.30184	1.30799	1.20298	1.29095	0.358788	0.152812	0.104504	0.176966	0.0785535	0.116636	0.196616	0.127323	0.0699377	0.0706141	0.176215	0.0837112	0.2309	0.0624595	0.0717204	0.15554	0.0878664	0.121979	0.703308	3.7e-05
Q61133_Gstt2	1.10488	1.07969	0.925344	0.954798	0.797162	0.952726	1.0452	1.44221	0.497566	0.590751	0.647854	0.942825	0.830809	0.706232	0.576823	0.829458	0.748928	0.934732	0.890801	0.845899	0.880967	0.830955	0.652303	0.579799	0.677043	1.23837	0.00234014
Q61268_Apoc4	1.12302	1.25205	0.486607	0.954956	0.425204	1.04504	0.921951	1.493	0.574503	0.463384	0.5561	0.521577	0.540088	0.491296	0.392031	0.397964	0.615015	0.633312	0.695909	0.634897	0.59321	0.63723	0.475948	0.604266	0.506436	1.23246	0.00163576
Q62191_Trim21	0.680424	0.812407	0.984299	1.14292	1.0157	0.92446	1.29029	1.24011	0.337726	0.595727	0.663561	0.643873	0.787459	0.350098	0.575935	0.448042	0.848146	0.717097	1.11693	0.821267	0.779348	0.990592	0.6915	0.659624	0.585831	1.36611	0.000372989
Q62264_Thrsp	1.3384	1.93947	0.462837	0.622185	0.718603	0.773756	1.28617	1.22624	0.254253	0.279526	0.294723	0.291999	0.219999	0.416277	0.46401	0.38878	0.544755	0.613133	0.247075	0.481802	0.188399	0.506229	0.405249	0.480941	0.293361	1.64089	0.000431099
Q62452_Ugt1a9	1.0271	0.9729	0.783647	1.15797	0.88981	0.902264	1.30084	1.05401	0.384254	0.44819	0.366222	0.449179	0.434097	0.505452	0.442408	0.307632	0.367758	0.367029	0.495119	0.719106	0.5256	0.637391	0.81491	0.547282	0.438253	1.22405	3.85e-07
Q64471_Gstt1	1.05432	1.02972	0.719321	0.884055	0.752226	1.01129	0.988708	1.50233	0.481563	0.508976	0.546933	0.813003	0.668825	0.690357	0.594809	0.853791	0.739314	0.801095	0.806855	0.752881	0.782155	0.852044	0.620009	0.588965	0.631817	1.21478	0.00302578
Q64487_Ptprd	0.970838	1.06409	0.982973	0.912978	1.04439	1.01703	1.05261	0.910312	0.345916	0.279593	0.305586	0.285959	0.379482	0.322978	0.315508	0.286652	0.264331	0.448868	0.396204	0.448211	0.448893	0.37834	0.383127	0.319822	0.310547	1.25477	6.44e-14
Q68FF9_Srd5a1	0.656517	0.435014	0.798728	1.49072	1.06083	1.61263	1.46364	0.939173	0.629361	0.345536	0.566302	0.289758	0.532376	0.474929	0.503654	0.234987	0.309003	0.414099	0.286125	0.422094	0.235596	0.259465	0.329736	0.457132	0.489291	0.652718	0.000117324
Q6GV12_Kdsr	1.14622	1.00779	0.650253	1.08706	0.779265	0.992206	1.15546	0.756025	0.879402	0.663258	0.559809	0.708474	0.594049	0.460516	0.531347	0.333569	0.672107	0.397467	0.55445	0.747153	0.941652	0.857101	0.939109	0.458222	0.576929	1.23001	0.0069959
Q6NS46_Pdcd11	1.03662	0.689579	0.868336	0.963382	1.14602	1.05722	1.07734	0.595367	0.393548	0.375071	0.276417	0.241453	0.271626	0.25314	0.291578	0.354663	0.418901	0.216652	0.32455	0.550987	0.24182	0.449856	0.365556	0.0956778	0.283998	1.21498	1.54e-07
Q6P3E7_Hdac10	0.572601	1.65943	1.5011	1.5369	0.989217	0.787103	0.910854	1.01078	0.69148	0.515688	1.19834	0.781467	0.577229	0.359269	0.492719	0.521099	0.753607	1.41631	0.380062	1.08963	0.700382	0.449116	0.729933	0.319502	0.549164	1.30227	0.0409445
Q6P5U7_Nwd2	1.12927	0.762039	0.97908	1.02092	0.515987	1.05598	0.791574	1.06587	0.678011	0.968124	1.09081	0.356784	1.10459	0.536753	0.603717	0.433061	0.725163	0.688088	0.356195	0.432505	0.535766	0.489069	0.436698	0.752938	0.640864	0.799573	0.0238451
Q6PEE2_Ctif	0.970856	1.48385	0.861023	0.813109	1.70345	0.855594	1.02914	1.05871	0.482708	0.461117	0.584814	0.43124	0.330163	0.38954	0.386898	0.371245	0.562526	0.714661	0.583898	0.642822	0.548218	0.613681	0.609161	0.495344	0.41039	1.45357	1.13e-05
Q76LS9_Mindy1	1.15975	1.00695	0.94879	0.875674	0.993054	1.07071	0.880653	1.04291	0.405582	0.335771	0.614463	0.359391	0.529571	0.422362	0.39171	0.472908	0.545273	0.648822	0.577164	0.456456	0.494228	0.51272	0.523165	0.487758	0.413972	1.25115	7.73e-10
Q78PG9_Ccdc25	0.685453	1.02368	1.04038	1.29833	1.16443	0.811111	0.976319	0.679914	0.462012	0.336768	0.396835	0.522968	0.276913	0.526316	0.390672	0.461194	0.489836	0.456802	0.441981	0.743366	0.559769	0.571639	0.431416	0.560901	0.429015	1.22327	4.49e-06
Q80UY2_Kcmf1	1.57148	1.56895	1.41374	0.982716	0.803931	1.01728	0.673608	0.621117	0.53585	0.365024	0.626761	0.559654	0.503788	0.345962	0.851648	0.77185	1.28157	1.17791	0.525505	0.391677	0.876418	0.929222	0.673742	0.601014	0.547752	1.41502	0.0187329
Q80VJ2_Sra1	0.99503	1.06187	1.29393	1.11021	0.92651	0.869796	1.00497	0.985284	0.461012	0.680463	0.568069	0.43247	0.685827	0.311123	0.456734	0.524518	0.817986	0.740494	0.404423	0.705422	0.703466	0.711675	0.498558	0.398225	0.492765	1.42957	3.65e-06
Q80X80_C2cd2l	1.50725	1.77005	1.42504	0.95907	1.04093	0.935228	0.651621	0.721593	0.369208	0.283601	0.264828	0.320242	0.492359	0.336963	0.702872	0.72376	0.482124	0.469661	0.421466	0.502637	0.123128	0.302057	0.578829	0.675648	0.353085	1.34781	0.000118729
Q8BG37_Prdx6b	1.24697	0.968055	0.970217	1.02978	0.710196	0.609134	1.07849	1.44597	0.507521	0.421429	0.65867	0.675128	0.581679	0.684092	0.561774	0.538675	0.972028	0.741669	1.05238	0.983704	0.608556	0.773019	0.788984	0.5703	0.571726	1.36604	0.00199101
Q8BGE6_Atg4b	1.00482	1.18813	0.855601	1.14912	0.775847	0.995178	0.59337	1.19122	0.426385	0.190619	0.401189	0.49082	0.449661	0.498471	0.412506	0.611593	0.543007	0.590594	0.507802	0.602216	0.485557	0.558474	0.547816	0.464118	0.438023	1.24517	2.98e-06
Q8BGG9_Acnat2	1.12973	0.786799	1.52477	0.237858	0.870275	3.22255	2.12113	0.462165	0.483713	0.519074	0.252457	0.502287	0.315893	0.284462	0.494859	0.34558	0.694867	0.33998	0.72813	0.485023	0.457472	1.04359	0.576782	0.906341	0.414646	1.53341	0.0273211
Q8BGV0_Nars2	1.43989	0.534575	0.884202	1.72307	0.994627	1.66564	1.00537	0.488369	0.407323	0.733971	0.666624	0.250529	0.52084	0.603159	0.487888	0.72633	0.210378	0.309371	0.669428	0.610221	0.769323	0.400407	0.371717	0.181981	0.561999	0.686944	0.00217913
Q8BK30_Ndufv3	1.21241	1.16378	0.684149	1.02254	0.967197	0.977463	0.87073	1.39837	0.557764	0.679576	0.216673	0.449219	0.3589	0.474994	0.515752	0.329744	0.34298	0.628643	0.60877	0.577191	0.549767	0.555415	0.612541	0.380788	0.462106	1.22548	3.43e-06
Q8BNI4_Derl2	0.757017	0.939415	1.18318	1.3733	1.28094	0.910988	0.910795	1.06058	0.768193	1.00951	0.608747	0.506312	0.715425	0.86014	0.869929	0.787944	0.513112	0.520471	0.767319	0.53336	0.656164	0.801232	0.774609	0.609737	0.778068	0.813489	0.00067724
Q8BP48_Metap1	0.63319	1.03926	0.960742	1.31279	1.36356	1.16954	0.955515	0.838327	0.646746	0.659009	0.580204	0.329855	0.293803	0.409272	0.318411	0.308949	0.504497	0.507972	0.487594	0.613519	0.385887	0.394021	0.602626	0.365901	0.369564	1.34225	5.51e-06
Q8BPM0_Daam1	1.43316	0.986061	0.812414	1.06185	0.671076	1.24672	1.01394	0.956015	0.583156	0.928893	0.81924	0.777251	0.910866	0.749086	0.565029	0.564459	0.757539	0.879419	0.968508	1.0063	1.01911	0.714297	1.06842	0.750334	0.763169	1.21069	0.0267416
Q8BUY5_Timmdc1	1.69499	1.08734	0.893078	0.508608	0.921333	1.20441	1.07867	0.880839	0.40789	0.342486	0.429812	0.215365	0.503729	0.394975	0.332486	0.189545	0.299495	0.400893	0.465201	0.44359	0.481198	0.514174	0.226098	0.510015	0.36873	1.23232	1.2e-05
Q8BWU8_Etnppl	1.02064	1.05505	0.801057	0.545368	0.39251	1.01925	0.980751	1.52708	0.209127	0.315452	0.349968	0.448298	0.489284	0.615335	0.317368	0.331941	0.282026	0.677779	0.480518	0.637593	0.420531	0.41356	0.544315	0.312277	0.340955	1.32136	0.000635268
Q8BXC6_Commd2	0.981866	0.8727	0.931246	1.10511	1.0707	0.959924	1.01813	1.08417	0.69224	0.899235	0.989492	0.960982	0.441137	0.812625	0.530397	0.659895	1.22573	0.98022	0.914712	0.933812	0.934603	1.09266	0.956587	0.65808	0.752432	1.25672	0.0136746
Q8C0J2_Atg16l1	1.28606	1.36003	1.21136	0.846025	1.10624	0.893764	0.762348	0.771576	0.572767	0.650363	0.622682	0.915291	0.992745	0.280637	0.502831	0.658372	0.882692	0.915477	0.849534	0.997031	0.713394	0.739211	0.631357	0.68765	0.636523	1.24799	0.00804998
Q8C0L9_Gpcpd1	1.50252	0.858723	0.410765	1.00788	0.992121	1.07044	1.21415	0.402919	0.404274	0.271283	0.302397	0.259069	0.390055	0.236397	0.264964	0.232588	0.36373	0.448645	0.25394	0.305944	0.316751	0.186714	0.337012	0.359393	0.268123	1.21915	3.92e-05
Q8C729_Fam126b	0.992593	1.26975	0.732025	1.25335	0.629624	0.89873	1.09447	1.00741	0.374602	0.532006	0.438909	0.5501	0.536448	0.511983	0.455493	0.243757	0.318556	0.404195	0.460436	0.718487	0.439312	0.248844	0.325206	0.351358	0.483738	0.780953	3.86e-06
Q8C767_Ppp1r3b	0.95739	1.1545	0.781764	1.04261	0.902266	1.24586	0.899881	1.24838	0.454839	0.433688	0.532443	0.307144	0.496499	0.387462	0.482662	0.419305	0.269714	0.305623	0.301346	0.336661	0.396408	0.319986	0.367	0.386604	0.444264	0.739029	1.33e-09
Q8C7I4_Apol9b	0.893263	0.345189	0.894461	1.66824	0.334002	1.11076	1.47832	1.10554	0.256005	0.191275	0.247806	0.318801	0.170704	0.193989	0.11178	0.168722	0.155235	0.478961	0.285665	0.17544	0.28233	0.371254	0.217599	0.208085	0.192632	1.29763	8.38e-05
Q8CF93_Galnt13	1.38714	1.00265	0.793557	1.3418	1.32642	0.997347	0.949116	0.0340307	0.367916	0.382596	0.0675348	0.609813	0.501989	0.656142	0.495417	0.732633	0.622021	0.575141	0.797712	0.873951	0.65812	0.801474	0.704681	0.738404	0.498703	1.44684	0.0135804
Q8CFI5_Pars2	1.00155	1.02419	1.12873	0.998449	0.849005	1.01986	0.834619	0.987156	0.773538	0.705629	0.619233	0.621362	0.927201	0.767289	0.629435	0.605687	0.550243	0.625738	0.84831	0.95819	0.938142	0.876399	0.782293	0.754298	0.667532	1.22137	0.00117976
Q8CI11_Gnl3	0.687706	1.2805	0.842536	1.10109	0.946184	0.922038	1.05382	1.36139	0.135371	0.163635	0.343635	0.154388	0.266305	0.0477102	0.172416	0.0344288	0.200968	0.256526	0.213804	0.35429	0.045785	0.198933	0.259135	0.0418928	0.159012	1.30422	3.34e-09
Q8CI75_Dis3l2	1.36234	1.48702	0.840559	0.979222	0.869673	1.04529	0.813134	1.02078	0.502766	0.734273	1.07758	0.686739	0.87539	0.591229	0.782293	0.530195	1.22724	1.03585	0.824065	0.861273	0.840384	0.901256	1.05306	0.362532	0.710506	1.24033	0.0488887
Q8JZL3_Thtpa	1.11034	1.32739	0.903008	0.970061	0.803486	1.11087	1.02994	0.359588	0.190571	0.214512	0.350855	0.3438	0.294602	0.207223	0.311544	0.193992	0.613724	0.471061	0.358257	0.262291	0.236665	0.390697	0.343596	0.35308	0.254557	1.3972	2.08e-06
Q8JZS0_Lin7a	0.900165	0.932433	1.02135	1.07062	1.00383	0.996166	0.961709	1.05844	0.306014	0.204231	0.448334	0.370719	0.275312	0.28271	0.277218	0.252382	0.246907	0.355298	0.455869	0.306009	0.632612	0.405875	0.53513	0.416222	0.279964	1.46822	9.24e-11
Q8K0H1_Slc47a1	1.00752	1.03076	0.734362	1.02551	0.896522	0.944431	0.992481	1.09952	0.634809	0.491734	0.751587	0.233531	0.621029	0.522511	0.546586	0.458312	0.58525	0.682917	0.711463	0.582058	0.735357	0.669673	0.619241	0.696175	0.534548	1.26517	3.09e-06
Q8K1H1_Tdrd7	0.975722	1.2787	1.02428	1.23305	1.08947	0.97017	0.788925	0.544326	0.676756	0.251398	0.456231	0.325102	0.71124	0.347179	0.409567	0.220426	0.479195	0.0341474	0.303792	0.315097	0.230339	0.0717753	0.180894	0.594636	0.378373	0.705826	7.29e-06
Q8K1J6_Trnt1	0.612968	1.04699	1.62216	1.2918	1.14961	0.763894	0.825723	0.953006	0.648855	0.742398	0.691763	0.757301	0.705592	0.764562	0.650222	0.700765	0.525985	0.861337	0.983397	0.951404	0.699934	1.02463	1.03124	0.770019	0.703178	1.28896	0.0334805
Q8K211_Slc31a1	0.941012	0.701039	1.0137	1.33402	1.67076	0.998072	1.00193	0.182167	0.229255	0.184553	0.163031	0.23031	0.19789	0.209774	0.167313	0.182781	0.0402484	0.14006	0.0767034	0.0339603	0.11169	0.172887	0.195145	0.156955	0.191222	0.658267	5.01e-06
Q8K274_Fn3krp	1.09053	1.0352	0.984418	0.970795	1.01828	0.971258	0.915125	1.01558	0.427759	0.363275	0.298759	0.331141	0.214168	0.491443	0.450098	0.331859	0.478446	0.615619	0.463651	0.473847	0.379098	0.434348	0.261705	0.444434	0.347567	1.30634	7.02e-11
Q8R0J8_Idnk	1.04601	1.19203	1.18867	0.939144	0.822021	0.953994	0.910376	1.32637	0.386441	0.232436	0.431396	0.463358	0.387959	0.524061	0.430805	0.532989	0.542824	0.628912	0.531427	0.720435	0.39213	0.59939	0.333982	0.427885	0.4311	1.24594	1.25e-07
Q8R104_Sirt3	1.27403	1.34752	0.882889	0.766008	0.916061	0.828913	1.08394	1.1495	0.618236	0.495148	0.511653	0.619782	0.460241	0.588654	0.465348	0.513663	0.472158	0.605298	0.684294	0.733345	0.742744	0.593083	0.731384	0.539019	0.512658	1.25775	6.56e-06
Q8R1G2_Cmbl	0.999261	0.950411	0.811009	1.00074	0.902773	1.04926	1.21259	1.50816	0.51169	0.533228	0.625388	0.728977	0.546462	0.765419	0.568408	0.685057	0.766044	0.722648	0.744473	0.746412	0.670739	0.821782	0.658966	0.599766	0.596898	1.22895	4.13e-05
Q8R1J9_Tor2a	0.978139	1.02186	1.16497	0.783716	0.766588	1.12616	1.13031	0.809872	1.10608	1.00227	0.455249	0.823717	0.987268	0.768386	0.603619	0.602143	0.728617	0.549099	0.682605	0.634338	0.616105	0.795737	0.63802	0.809584	0.796051	0.829484	0.0159772
Q8R1S9_Slc38a4	0.973993	1.32828	2.38602	0.84522	1.02601	0.78817	0.888258	1.12996	0.536064	0.591105	0.562458	0.588537	0.999128	0.562859	0.541505	0.534556	0.53809	0.900193	1.07218	0.69682	1.0591	0.3782	0.732454	0.648582	0.562659	1.27011	0.017901
Q8R1T4_Slc35a3	1.3829	0.852735	1.33687	1.1342	1.24816	0.688917	0.865801	0.620253	0.469182	0.447856	0.271582	0.208422	0.255869	0.289739	0.241094	0.255472	0.40927	0.364595	0.263658	0.379449	0.298163	0.359727	0.34047	0.268051	0.263725	1.32751	6.34e-07
Q8R332_Nup58	0.783738	0.835587	0.919083	1.33554	1.29052	1.08092	1.24853	0.638978	0.822902	0.392882	0.41604	0.398017	0.286038	0.312177	0.349895	0.379979	0.313543	0.339559	0.328077	0.351497	0.205288	0.621015	0.286121	0.212245	0.386431	0.830188	3.87e-06
Q8R3F5_Mcat	1.19336	1.03738	0.74125	1.00893	0.875521	0.991065	0.855575	1.02275	0.637679	0.383855	0.419459	0.424068	0.525804	0.682919	0.564024	0.524598	0.613989	0.584864	0.650182	0.691288	0.689599	0.536219	0.468126	0.675667	0.525201	1.20351	1.04e-06
Q8R3I3_Cog6	0.605917	0.409147	1.40704	1.09625	1.22418	0.903746	1.40017	0.412552	0.256613	0.579312	0.637733	0.371969	0.411623	0.670225	0.5577	0.43046	0.653098	0.276323	0.42392	0.295666	0.300043	0.438862	0.47912	0.302783	0.49408	0.73541	0.00251402
Q8R3W2_0610009B22Rik	0.964266	1.03573	0.726455	0.635679	1.13334	1.09274	1.16596	0.675415	0.561454	0.355201	0.837663	0.707061	0.148314	0.221819	0.311285	0.243299	0.940175	0.603185	0.677746	0.551244	1.7221	0.994713	0.942853	0.628061	0.333243	2.42754	0.0069023
Q8R480_Nup85	0.781893	0.9412	0.895624	1.0588	1.07011	1.08119	1.26545	0.937295	0.562199	0.422767	0.647881	0.466887	0.298604	0.648223	0.468542	0.35905	0.774928	0.541501	0.552705	0.74632	0.41507	0.586768	0.692076	0.471991	0.467715	1.21813	1.89e-06
Q8R519_Acmsd	0.649088	0.672113	1.50587	0.989467	0.648659	1.13501	1.19627	1.01053	0.402564	0.651715	0.472897	0.588659	0.524541	1.05237	0.548704	0.539916	0.66197	0.892817	0.84925	0.679955	0.486142	0.825975	0.758358	0.495119	0.54431	1.32123	0.016819
Q8VBT2_Sds	0.848299	0.91215	1.92553	0.755124	0.943191	1.05681	1.09137	1.23689	0.311357	0.415373	0.401872	0.410508	0.45012	0.528323	0.315728	0.446717	0.389418	0.610128	0.659403	0.556123	0.521329	0.633162	0.611964	0.411542	0.41294	1.41213	3.39e-05
Q8VC12_Uroc1	1.02025	1.08041	0.979748	0.88925	0.790858	0.964067	1.07761	1.24353	0.491045	0.531497	0.692663	0.679534	0.599025	0.753269	0.534481	0.624907	0.548119	0.721443	0.843604	0.794499	0.785935	0.780545	0.754885	0.661878	0.611966	1.25451	6.68e-06
Q8VDW0_Ddx39a	0.984806	0.876805	1.07841	0.729914	1.1004	0.946426	1.01519	1.14538	0.740224	0.55701	0.431702	0.659801	0.618117	0.563065	0.659655	0.705316	0.861077	0.744451	0.849117	0.928048	0.669563	0.900444	0.916207	0.576869	0.638886	1.33842	7.76e-05
Q8VE95_	1.25942	1.4377	0.867297	1.00049	0.705779	1.14278	0.674956	0.999513	0.18773	0.772087	0.786267	0.617443	0.880583	0.785499	0.0482055	0.178623	0.847416	1.14894	1.21177	1.26832	1.05655	0.054244	0.991701	0.802766	0.694765	1.47406	0.0323666
Q8VEH6_Cbwd1	0.576943	0.663769	1.29843	1.09599	1.13736	1.17641	0.904008	0.708035	0.511745	0.297307	0.957686	1.07068	0.28221	0.812139	0.722229	1.02055	1.07364	1.33138	0.879764	1.34041	1.16268	1.27831	1.24556	0.967461	0.767184	1.56953	0.0142212
Q91VY9_Znf622	0.760099	1.02548	1.38577	0.730933	0.991745	1.00825	1.37822	0.6234	0.4219	0.297899	0.345409	0.730452	0.325251	0.455622	0.285603	0.599633	0.394321	0.711984	0.263854	0.588515	0.342612	0.62068	0.792716	0.667893	0.383654	1.57589	0.000290266
Q91WG2_Rabep2	1.23672	1.32284	1.03397	1.10794	0.740229	0.833494	0.864119	0.966028	0.526252	0.68127	0.684109	0.777206	0.850608	0.814623	0.582695	0.685367	1.02728	0.805721	0.874687	0.85542	0.976416	1.03295	0.554502	0.786158	0.684738	1.26334	0.00626509
Q91X52_Dcxr	1.16854	1.15364	0.929669	0.947124	0.841598	0.890364	1.05288	1.34843	0.376321	0.496463	0.633654	0.657354	0.52378	0.698842	0.448234	0.709256	0.625068	0.736188	0.773957	0.747483	0.730262	0.70738	0.610911	0.549383	0.578717	1.24209	4.93e-06
Q91XD7_Creld1	0.947676	0.850015	0.848763	1.05232	1.12001	0.927919	1.15535	1.06136	1.05891	0.318638	0.858195	0.702361	0.69331	0.794475	0.705495	0.265539	0.328649	0.494208	0.638032	0.485044	0.653546	0.748009	0.890566	0.498184	0.703928	0.807054	0.00244559
Q91YY4_Atpaf2	0.867761	1.01068	0.989321	0.898937	1.06154	0.921166	1.17548	1.31225	0.749093	0.847055	0.76591	0.843284	0.721493	0.720251	0.690361	0.652917	0.478726	0.920022	0.928605	1.00851	0.917981	0.890273	0.907982	0.859996	0.735293	1.24166	0.00309587
Q91Z38_Ttc1	0.71274	1.00259	0.997413	1.23947	1.08371	0.921652	1.03607	0.768782	0.322758	0.311464	0.32922	0.432707	0.357765	0.388573	0.487693	0.385969	0.888503	0.469519	0.599141	0.499821	0.629611	0.411627	0.609337	0.433484	0.371867	1.47763	5.57e-07
Q923Z3_Mto1	0.719356	1.0123	1.21688	1.1194	0.987699	1.26164	0.878954	0.746954	0.855857	0.709078	0.581462	0.782735	0.968633	0.966276	0.599132	0.614484	0.480305	0.752049	0.538886	0.788184	0.501083	0.619044	0.506455	0.738175	0.745906	0.77619	0.00146262
Q924Y0_Bbox1	1.15897	1.06891	0.600222	0.962768	0.830544	0.974589	1.02541	1.17843	0.414396	0.503765	0.625242	0.661477	0.49613	0.563338	0.498826	0.610683	0.720417	0.695507	0.717704	0.661346	0.721233	0.638675	0.586964	0.545068	0.533551	1.27153	1.06e-05
Q99J09_Wdr77	1.00121	1.18161	0.903412	0.99879	1.00209	0.687924	0.817985	1.14654	0.507433	0.746504	0.642713	0.696651	0.745414	0.533173	0.560278	0.608385	1.0917	0.794039	0.821372	0.692545	0.761035	0.924633	0.548263	0.47536	0.625549	1.24297	0.00256208
Q99JW2_Acy1	1.02799	1.17236	0.972012	0.707405	0.797351	0.847637	1.04201	1.20213	0.368334	0.516644	0.529548	0.724299	0.503601	0.77623	0.527474	0.815438	0.676641	0.727715	0.841032	0.760946	0.750408	0.648623	0.586408	0.618371	0.528511	1.3286	0.000307872
Q99LI8_Hgs	0.926159	1.29055	1.23858	1.07384	0.759581	1.11847	0.719488	0.487815	0.747549	0.791308	0.710281	0.649483	0.852372	0.7335	0.595635	0.796466	0.620467	0.418628	0.633225	0.503583	0.73468	0.577273	0.501086	0.628423	0.740525	0.80871	0.00307158
Q99N19_Cyp4f13	1.06746	1.11082	0.92206	0.975656	0.994334	0.939909	1.03883	1.00567	0.700168	0.822437	0.71885	0.464657	0.641707	0.50348	0.606154	0.401912	0.442674	0.380842	0.550009	0.597033	0.528527	0.451171	0.683314	0.503084	0.62393	0.826703	1.19e-07
Q99N84_Mrps18b	0.9185	1.09029	0.997129	1.05131	1.02705	1.00287	0.833042	0.890899	0.542172	0.430382	0.621302	0.445669	0.452787	0.592018	0.556415	0.566508	0.309569	0.333494	0.435707	0.575495	0.329374	0.493368	0.812087	0.340204	0.549294	0.706281	2.12e-07
Q9CQ85_Timm22	0.993318	1.27669	1.12719	0.947253	1.16047	0.779211	1.00668	0.677971	0.919625	0.69201	0.931754	0.753645	0.567176	0.878547	0.599511	0.722441	0.886512	0.849097	0.91201	0.805773	0.875975	0.889692	1.12528	0.977879	0.738043	1.20332	0.0244446
Q9CQG1_Chac2	1.04448	1.2195	1.03289	0.967113	0.770499	0.772457	0.88674	1.09821	0.454472	0.499616	0.79676	0.75306	0.574385	0.630284	0.511281	0.782563	0.973825	0.96646	0.778962	0.908053	0.686624	0.718426	0.675628	0.683902	0.602334	1.24299	0.000764908
Q9CQJ6_Denr	1.03836	1.02543	0.959244	0.974565	0.948668	1.08439	0.855588	1.09039	0.490678	0.671918	0.911401	0.741132	0.74573	0.627219	0.699949	0.565902	0.972599	0.878954	0.824909	0.84972	0.90297	0.829846	0.832421	0.80501	0.685934	1.22617	1.62e-05
Q9CQL5_Mrpl18	0.954672	1.16898	0.740595	1.05278	0.655488	1.04533	0.839213	1.53583	0.403977	0.3379	0.458837	0.510258	0.466262	0.378886	0.23286	0.40632	0.560284	0.67044	0.609589	0.765192	0.268941	0.313793	0.741734	0.270978	0.405148	1.44376	6.75e-05
Q9CQW0_Emc6	1.03758	0.645107	1.00049	0.963073	1.04454	0.676041	1.15371	0.999506	0.431267	1.05281	0.469084	0.639484	0.748841	0.58542	0.502294	0.168501	0.217649	0.334566	0.643561	0.328406	0.481572	0.333203	0.403162	0.364852	0.543857	0.643016	0.000148175
Q9CQW3_Proz	1.19274	1.35011	0.55418	0.965199	1.0348	0.725138	0.903772	1.50268	0.469189	0.493934	0.386711	0.310116	0.605873	0.448623	0.360074	0.179413	0.445122	0.400869	0.606762	0.543265	0.333908	0.551713	0.558856	0.554654	0.417667	1.31083	2.76e-05
Q9CQY6_Uqcc2	1.19438	0.880988	0.792514	1.00627	0.946203	1.15223	0.993729	1.23734	0.850186	0.582284	0.848088	0.521152	0.905593	0.855371	0.729098	0.811081	0.499154	0.340124	0.54644	0.705152	0.872749	0.640775	0.775695	0.762034	0.829585	0.811206	0.000676735
Q9CW79_Golga1	0.501993	0.723594	0.764041	1.5384	1.53498	1.16773	1.57045	0.832273	0.523949	0.857412	0.423656	0.521198	0.577864	0.870574	0.587946	0.606186	1.10514	0.943459	0.899358	0.54297	0.728982	0.386341	0.993403	0.616714	0.582905	1.39675	0.0300841
Q9CWU6_Uqcc1	1.10115	1.10798	0.761694	0.731606	0.932769	1.09128	1.06723	0.784629	1.10282	0.475003	0.553495	0.325668	0.65953	0.443207	0.902092	0.285392	0.563653	0.602307	0.753175	0.633833	0.651824	0.922845	0.637982	0.342245	0.514249	1.23658	0.0105109
Q9CWX9_Ddx47	0.591273	1.3421	1.6099	0.436461	1.56746	1.0395	0.960505	0.279691	0.463589	0.253887	0.266235	0.156538	0.216108	0.0828097	0.224235	0.164088	0.159656	0.241406	0.290878	0.212907	0.164158	0.190466	0.167947	0.12901	0.220172	0.81394	0.000113308
Q9CYS6_	1.01523	0.929305	0.846633	1.01937	0.984771	1.10857	1.12361	0.765982	0.578148	0.522085	0.54471	0.465398	0.572165	0.528393	0.392868	0.366539	0.373071	0.430649	0.522216	0.44833	0.424168	0.41825	0.521744	0.40353	0.525239	0.81374	2.18e-09
Q9CZD5_Mtif3	1.0153	0.888348	0.984695	1.06303	1.20106	1.23948	0.815854	0.490088	0.549384	0.475301	0.416629	0.370334	0.801745	0.400201	0.0253636	0.545892	0.182382	0.0714563	0.401265	0.23163	0.255128	0.452559	0.233886	0.392717	0.445965	0.548265	1.08e-05
Q9D0B5_Tstd3	1.03795	0.81289	0.916895	1.27024	0.755297	1.2196	1.00776	0.992237	0.404241	0.630153	0.415381	0.384366	0.197567	0.489601	0.269774	0.274531	0.483834	0.349829	0.708467	0.555252	0.434305	0.564037	0.59919	0.333753	0.394303	1.31762	6.7e-07
Q9D1P4_Chordc1	0.584834	0.619964	1.02664	1.3924	1.18683	0.973356	1.20896	0.337327	0.331504	0.0983984	0.279629	0.400669	0.153348	0.5289	0.404412	0.165086	0.496599	0.372908	0.51484	0.371691	0.0517287	0.257606	0.540584	0.510251	0.305567	1.42278	0.000278207
Q9D3U0_Pus10	0.685726	0.976901	0.782566	1.0231	1.39346	1.49597	1.49987	0.744795	0.112583	0.372585	0.574016	0.896166	0.331741	0.465417	0.573212	0.578421	1.66958	1.04529	0.0953937	0.498162	0.312993	0.348904	0.118817	0.35066	0.519314	0.673546	0.0208022
Q9D711_Pir	0.845722	0.592332	1.3048	1.09193	1.02795	0.972052	0.654961	1.2797	0.699644	0.731381	0.0808154	0.320844	0.286321	0.544544	0.540333	0.65063	0.940649	0.69537	0.611474	0.932777	0.667256	0.82334	0.748257	0.838603	0.542438	1.44864	0.00138051
Q9DB27_Mcts1	0.974736	0.786274	1.5782	1.10036	1.00242	1.54319	0.997581	0.968025	0.609829	0.653434	0.709641	0.884459	0.400169	0.739266	0.694991	0.757835	1.00209	0.901251	0.884138	0.856815	1.01215	0.922768	0.849856	0.815238	0.702316	1.27107	0.00131543
Q9DCP2_Slc38a3	0.856809	0.897122	2.70024	0.937422	1.50757	0.808259	1.06258	1.11556	0.412634	0.631701	0.483818	0.426951	0.647257	0.594252	0.442235	0.362341	0.324454	0.651379	0.692164	0.594934	0.804344	0.454038	0.556786	0.468358	0.463027	1.24369	0.00281937
Q9DCT5_Sdf2	1.1612	1.11922	0.767061	1.01727	0.877877	0.982735	0.961528	1.05129	0.754831	0.862064	0.580266	0.436429	0.606522	0.713327	0.738492	0.770426	0.497078	0.569268	0.261643	0.46599	0.608234	0.650066	0.461047	0.690747	0.725909	0.73449	9.67e-06
Q9DD18_Dtd1	1.07825	0.867669	0.634512	0.865121	1.45526	0.921749	1.35963	1.51567	0.250553	0.119357	0.486651	0.127405	0.127881	0.239187	0.329313	0.378007	0.339728	0.476595	0.374894	0.415914	0.558265	0.620828	0.224966	0.250123	0.24487	1.61475	1.7e-06
Q9EP96_Slco1a4	1.03405	1.13447	0.833084	0.993459	1.00654	1.12521	0.958281	0.548513	0.403541	1.06737	0.770608	0.758067	0.930318	0.32775	0.387639	0.640796	0.582405	0.390066	0.38913	0.603908	0.59108	0.495982	0.539178	0.676179	0.699432	0.801781	0.00255619
Q9EQ80_Nif3l1	0.525091	1.14279	0.793362	1.04145	1.52454	0.522217	0.95855	2.47673	0.470299	0.592409	0.546021	0.727025	0.0707353	0.595054	0.217819	0.502865	1.26541	0.564372	0.576293	0.68353	0.753871	0.811985	0.668521	0.335091	0.524443	1.28904	0.025811
Q9JHL1_Slc9a3r2	6.42719	0.769213	4.66115	0.590318	0.495086	6.77432	0.635793	1.23079	0.466783	0.162063	0.452891	0.168655	0.576934	0.15686	0.29502	0.340193	0.522058	0.468528	0.590088	0.147363	0.261515	0.666857	0.417858	0.550662	0.317607	1.55945	0.0194448
Q9JIW9_Ralb	0.965771	0.984388	1.01561	1.04851	1.02293	0.8204	0.774684	1.05357	1.1548	0.621431	0.689124	0.410763	0.504125	0.891881	0.639499	0.617449	0.617783	0.791161	0.791711	0.830632	0.578952	0.837761	0.921032	0.922462	0.630465	1.28662	0.0198304
Q9JJK5_Herpud1	1.05992	1.12021	0.950698	0.850345	1.0493	0.838513	0.697429	1.09263	0.822683	0.814935	0.813378	0.428082	0.680217	0.642833	0.765741	0.548319	0.712332	0.509705	0.651143	0.685198	0.595048	0.566298	0.559088	0.555226	0.722979	0.803167	0.00012305
Q9JJW0_Pxmp4	0.931874	0.915451	1.09081	1.01006	0.989942	0.962323	1.36421	1.44761	0.72321	0.799526	0.564335	0.66582	0.503919	0.874259	0.688087	0.701744	0.39435	0.558141	0.599549	0.800803	0.371911	0.545745	0.648474	0.605211	0.694915	0.832972	1.44e-05
Q9JK38_Gnpnat1	1.02429	1.00202	1.12277	0.949321	1.02215	0.853831	0.861093	0.997978	0.313081	0.422758	0.451725	0.425416	0.392109	0.434044	0.306865	0.447544	0.516171	0.555011	0.526959	0.578105	0.406199	0.524232	0.425205	0.401067	0.424087	1.22664	5.93e-11
Q9JK42_Pdk2	0.919685	0.883703	1.24708	0.708739	0.940626	1.05937	1.25405	1.06609	0.676189	0.780855	0.716143	0.919522	0.88983	0.799201	0.709423	0.575697	0.791176	1.13239	1.13219	1.27674	1.13672	1.06487	1.23774	0.459896	0.748499	1.51274	0.0360552
Q9JLZ8_Sigirr	0.989366	0.618001	0.867505	0.879082	1.06979	1.0834	1.27975	1.01063	0.894597	0.647672	0.639695	0.538926	0.588221	0.971163	0.743241	0.667447	0.51349	0.5223	0.772115	0.7674	1.10571	0.870737	0.833591	0.813835	0.657559	1.20594	0.0322782
Q9QXZ6_Slco1a1	0.97901	1.05614	0.565656	0.979736	0.767823	1.1766	1.14656	1.02026	0.157182	0.0917894	0.133523	0.0816848	0.105163	0.211074	0.133109	0.0731009	0.0834797	0.0807672	0.0436958	0.15604	0.0260476	0.0371484	0.145417	0.140827	0.119136	0.689325	1.33e-10
Q9QYB1_Clic4	0.890854	0.849076	1.05471	1.03928	0.989645	1.01036	0.950136	1.11388	0.712889	0.645032	0.738734	0.909258	0.688172	0.875472	0.713715	1.05765	1.0291	1.15023	0.8887	0.963126	0.726396	1.08914	0.765413	0.794432	0.726224	1.27497	0.0351596
Q9QYI3_Dnajc7	0.920809	0.959961	1.18471	1.04577	1.02913	0.970873	0.942701	1.05843	0.415522	0.3078	0.367605	0.387631	0.432802	0.351974	0.586891	0.393718	0.550278	0.481742	0.633179	0.579375	0.359611	0.64397	0.443107	0.445713	0.390675	1.32082	5.74e-10
Q9QYR9_Acot2	1.65082	0.907182	0.755443	0.349179	1.15188	0.669312	1.09282	2.87661	0.320912	0.100663	0.270408	0.485079	0.332761	0.406596	0.229553	0.372763	0.174475	0.280381	0.627802	0.440432	0.484741	0.596259	0.522322	0.33663	0.326837	1.41534	0.00468897
Q9QZB7_Actr10	1.00373	0.934052	0.996266	1.31335	1.46421	1.18619	0.9766	0.993252	0.288069	0.257065	0.423252	0.321249	0.407805	0.432383	0.291353	0.254944	0.402266	0.328266	0.46572	0.428571	0.308685	0.429022	0.481932	0.370857	0.306301	1.35624	9.98e-10
Q9QZN4_Fbxo6	1.05392	0.946082	0.844787	0.289665	2.53436	2.58974	0.538687	2.18882	0.431725	0.223365	0.237919	0.393213	0.227813	0.258504	0.571818	0.605828	0.593819	1.16286	0.716031	0.404445	0.289159	0.315313	0.420867	0.743285	0.325859	1.55694	0.00819772
Q9QZU9_Ube2l6	0.792902	0.979855	2.21953	1.02015	1.28254	0.468151	0.978249	1.02253	0.605441	0.483143	0.227845	0.285382	0.429016	0.358928	0.206584	0.733085	0.782153	0.847295	0.62629	0.571706	0.4785	0.295192	0.49089	0.249823	0.393972	1.34857	0.00269435
Q9R0L7_Akap8l	0.897105	0.904161	1.29609	1.14001	1.08441	1.27825	0.915586	0.870126	0.508893	0.597044	1.47701	0.531968	0.500989	0.512848	0.339198	0.343059	0.232661	0.412885	0.416897	0.44462	0.546012	0.154079	0.23968	0.359801	0.510871	0.756244	0.000141166
Q9WTV6_Usp18	0.959042	0.846068	1.15893	1.0361	1.09109	0.963903	1.32681	0.796547	0.553319	0.487948	0.707333	0.562531	0.261214	0.548248	0.684659	0.664429	1.34575	1.69916	0.856252	0.611922	0.731178	0.812126	0.570908	0.474818	0.557925	1.38307	0.014783
Q9WU19_Hao1	1.01087	0.989126	0.876571	1.14991	1.09804	0.9304	1.05743	0.978538	0.639512	0.65772	0.554707	0.466874	0.455905	0.758362	0.459964	0.492895	0.427293	0.435863	0.429782	0.545063	0.353149	0.404812	0.584223	0.545345	0.523801	0.826311	5.21e-09
Q9Z0R6_Itsn2	0.573403	0.277064	1.03879	1.00719	1.62491	0.405688	0.992806	1.31669	0.522433	0.350108	0.691443	0.331061	0.184326	0.546169	0.333729	0.375445	0.416474	0.434891	0.415121	0.600308	0.497599	0.405675	0.613694	0.590479	0.362776	1.28521	0.00988421
Q9Z1K6_Arih2	1.47972	1.12255	0.902043	0.780282	1.02439	0.791643	0.975612	1.07239	0.492376	0.795556	0.865688	0.764778	0.824514	0.615073	0.753992	0.650555	1.00304	1.00505	1.00994	0.928963	0.721865	0.998946	0.731041	0.808211	0.759385	1.26939	0.0103209
Q9Z1Q2_Abhd16a	1.00982	1.01811	0.862608	1.25865	1.06258	0.818086	0.990175	0.935314	0.815855	0.806103	0.766563	0.615021	0.775315	0.579886	0.7391	0.599512	0.509244	0.575485	0.630406	0.650366	0.610756	0.535299	0.621011	0.72401	0.752831	0.81809	3.61e-06
Q9Z211_Pex11a	1.12674	1.01053	0.647905	0.903858	0.989472	0.925314	1.15349	1.42621	0.537197	0.507117	0.425245	0.405614	0.466176	0.497618	0.605097	0.46089	0.359001	0.381276	0.385545	0.459535	0.37407	0.406056	0.54468	0.450868	0.481897	0.821338	2.31e-07
Q9Z2V4_Pck1	0.791623	0.968747	1.18379	0.980866	1.01913	1.03911	0.935439	1.13333	0.476765	0.712677	0.668202	0.586936	0.728384	0.834213	0.591503	0.658158	0.720345	0.933225	1.02352	0.960534	0.808432	0.72312	0.845483	0.714748	0.66318	1.24696	8.58e-05
