# Supplementary material for: Quantitative proteomics reveals the protective effects of Yinchenzhufu decoction against cholestatic liver fibrosis in mice by inhibiting the PDGFRβ/PI3K/AKT pathway
Source: Front Pharmacol. 2024 Feb 26;15:1341020. doi: 10.3389/fphar.2024.1341020 (PMC10926276; doi:10.3389/fphar.2024.1341020)
Supplement: Supplementary file 3 [file Table1.xlsx]

## Sheet: Table S1
Figure A: The total representative ion chromatogram of YCZFD extract in the (ESI+) positive and (ESI-) negative ion modes.						Figure B: The total ion chromatogram of representative ingredient reference standards in the (ESI+) positive and (ESI-) negative ion modes.
Table S1 Identiﬁed plant metabolites in Yinchenzhufu Decoction (YCZFD) extract
	tR	Polarity	name	composition	[M+H]+	[M-H]-	ms/ms(+)	ms/ms(-)
	min				m/z	m/z
1	0.54	+/-	Proline	C5H9NO2	116.071	114.055
2	0.72	+/-	7-Methoxycoumarine	C10H8O3	177.055	175.039	163135
3	0.84	+	Neochlorogenic acid	C16H18O9		353.087
4	0.92	+/-	Chlorogenic acid*	C16H18O9	355.102	353.087	337163135
5	0.93	+/-	7-Hydroxycoumarin	C9H6O3	163.039	161.024	133117
6	1.15	+/-	Karacoline/karakoline	C22H35NO4	378.264		360, 342, 332, 328, 310
7	1.32	+	9-Hydroxysenbusine A	C23H37NO7	440.264		422, 408, 404, 390
8	1.43	+	Mesaconine	C24H39NO9	486.269		468, 454, 436, 422, 404, 378
9	1.52	+	Scoparone*	C11H10O4	207.066
10	1.72	+/-	Licoagroside B	C18H24O12	433.134	431.118
11	1.81	-	Syringic acid	C9H10O5	199.06	197.044
12	2.18	+	Catechin	C15H14O6	291.086	289.071
13	2.2	-	6,7-Dihydroxycoumarin	C9H6O4	179.035	177.019		149133105
14	2.55	-	Nicotiflorin	C27H30O15	595.166	593.15	577475355299	575473383353297
15	2.58	+/-	Isoliquiritin*	C21H22O9	419.134	417.118
16	2.62	+	Fuzitine	C20H24NO4	342.17		297, 265, 311, 279, 26
17	2.72	-	1,5-Dicaffeoylquinic acid	C25H24O12		515.12		353335191179
18	2.8	+	Schaftoside	C26H28O14	565.155	563.14	547409325295283
19	2.96	+/-	4, 5-O-dicaffeoyl quinic acid	C25H24O12	517.134	515.118		353335191179173
20	2.97	+	4'-Hydroxyacetophenone*	C8H8O2	137.06	135.045	119,93
21	3.03	+	Rutin	C27H30O16	611.161	609.146	465285257229165
22	3.15	+/-	Isoliquiritigenin*	C15H12O4	257.081	255.065
23	3.18	+/-	Scopoletin	C10H8O4	193.049	191.034	163147119
24	3.3	+/-	Quercitrin	C21H20O11	449.108	447.092		173335179191135
25	3.45	+/-	Licorice saponin J2	C42H64O16	825.434	823.418	473649455437419	719685351
26	3.48	-	6-demethoxy-4-methylcapillarisin	C16H12O6	301.071	299.055		284151163
27	3.58	+/-	liquiritin apioside	C26H30O13	551.176	549.16	419257137	429417297255213
28	3.59	+	7-Deoxylycoctonine	C25H41NO6	452.302		420, 388, 356, 370
29	3.69	+/-	Liquiritigenin*	C15H12O4	257.081	255.065
30	3.71	+	Calycosin 7-O-glucoside*	C22H22O10	447.129	445.113
31	3.82	+	Benzoylmesaconitine*	C31H43NO10	590.296	588.28
32	3.87	+	Ononin*	C22H22O9	431.134	429.118	269
33	4.01	-	Quercetin	C15H10O7	303.05	301.034	273257229	301255151
34	4.05	-	Cinnamic acid*	C9H8O2	149.06	147.044
35	4.07	-	Licorice-saponin E2	C42H60O16	821.399	819.383	469.3,645.4,469,451.3,391,285	643463351289193
36	4.1	+	Benzoylaconine*	C32H45NO10	604.312	602.296
37	4.24	+	Benzoylhypaconine*	C31H43NO9	574.301	572.285
38	4.34	+	Glycyrrhizic acid*	C42H62O16	823.412	821.396	647471453435	803, 645.3702, 351.0476
39	4.63	+/-	Capillarisin*	C16H12O7	317.066	315.05	302209
40	4.65	+	14-Benzoylneoline	C31H44NO7	542.312		524, 492, 460
41	4.7	-	Dehydrated-benzoylhypaconine	C31H42NO8	556.29		524, 496, 464, 432
42	4.83	-	Licorice glycoside D	C35H36O15	697.213	695.197	419257	447417391
43	5	+/-	Formononetin*	C16H12O4	269.081	267.065	254237226213107	252195
44	5.04	+	Hypaconitine	C33H45NO10	616.312
45	5.49	+/-	Calycosin*	C16H12O5	285.076	283.061
46	5.91	+/-	Odoration	C17H14O6	315.086	313.071	299257229	283255
47	5.92	-	Glabranin	C20H20O4	325.143	323.128
48	5.95	+/-	Isolicoflanone	C20H18O6	355.118	353.102	337299287271213	338297284269227
49	6.02	+	Atractylenolide I*	C15H18O2	231.138	229.122	185157143129
50	6.08	+	Atractylenolide III*	C15H20O3	249.149	247.133	231203189175163
51	6.37	+	Licoricone*	C22H22O6	383.149	381.133	369355299327	351297269
52	6.73	+	Delsoline*	C25H41NO7	468.296		436, 404, 386, 372 322
53	6.9	+	Atractylenolide II*	C15H20O2	233.154		215187145
54	7.6	+	Licoricidin*	C25H28O6	425.196	423.18		353221148369212
55	7.7	+	Glycyrrhetinic acid*	C30H46O4	471.347	469.331
56	8.33	+	Karakanine*	C22H33NO4	376.249		358, 340, 328, 312, 300
57	8.8	-	α-Linolenic acid*	C18H30O2		277.217		260205
58	9.39	+	Palmitic acid*	C16H32O2	257.248	255.232
*: plant metabolites were identified by comparing with standards; the others: plant metabolites were deduced on the basis of accurate molecular weights and MS2 fragments with those data in the literature which had been published

## Sheet: Table S2
Table S2 Content determination of 18 plant metabolites in Yinchenzhufu Decoction (YCZFD) extract
Ingredient	Contents（μg/g ）
Chlorogenic acid	782.2	±	80.03
Scoparone	0.48	±	0.026
4-Hydroxyacetophenone	16.61	±	1.69
Atractylenolide Ⅰ	39.11	±	4.8
Atractylenolide Ⅱ	1.93	±	0.13
Atractylenolide Ⅲ	25.61	±	2.27
Benzoylaconine	2.09	±	0.09
Benzoylhypaconine	3.08	±	0.1
Benzoylmesaconitine	163	±	8.46
Formononetin	1.83	±	0.09
Glycyrrhitinic acid	0.38	±	0.04
Glycyrrhizic acid	1275.88	±	124.63
Isoliquiritigenin	9.32	±	1.05
Isoliquiritin	91.1	±	2.13
Liquiritigenin	32.75	±	1.2
Liquiritin	901.26	±	62.42
Ononin	17.16	±	0.53
Cinnamic acid	32.02	±	3.06

## Sheet: Table S3
Table S3 Gene sequence of primers
Gene	Primer sequences
Mm_GAPDH_FW	AGGTCGGTGTGAACGATTTG
Mm_GAPDH_RW	GGGGTCGTTGATGGCAACA
Mm_PDGFRβ-FW	GCAGTTGCCTTACGACTCCAGA
Mm_PDGFRβ-RW	GGTTTGAGCATCTTCACAGCCAC
Mm_FN1-FW	CCCTATCTCTGATACCGTTGTCC
Mm_FN1-RW	TGCCGCAACTACTGTGATTCGG
Mm_COl1A1-FW	CCTCAGGGTATTGCTGGACAAC
Mm_ COl1A1-RW	CAGAAGGACCTTGTTTGCCAGG
Mm_SMAD2_FW	CCAACTGTAACCAGAGATACGGC
Mm_SMAD2_RW	AACCCTGGTTGACAGACTGAGC
Mm_SMAD3_FW	GCTTTGAGGCTGTCTACCAGCT
Mm_SMAD3_RW	GTGAGGACCTTGACAAGCCACT
Mm_AKT_FW	GGACTACTTGCACTCCGAGAAG
Mm_AKT_RW	CATAGTGGCACCGTCCTTGATC
Mm_PIK3R1_FW	CAAACCACCCAAGCCCACTACT
Mm_ PIK3R1_RW	CCATCAGCAGTGTCTCGGAGTT
Mm_PDGF-B_FW	AATGCTGAGCGACCACTCCATC
Mm_PDGF-B_RW	TCGGGTCATGTTCAAGTCCAGC
